1 **RNA Pol IV has antagonistic parent-of-origin effects on Arabidopsis endosperm**

2 Prasad R.V. Satyaki<sup>1</sup> and Mary Gehring<sup>1,2</sup>

3 <sup>1</sup> Whitehead Institute for Biomedical Research, Cambridge MA 02142

4 <sup>2</sup> Department of Biology, Massachusetts Institute of Technology, Cambridge MA 02139

5 Corresponding author: M.G. (mgehring@wi.mit.edu)

6

1

## 2 **Abstract**

3 Gene expression in endosperm – a seed tissue that mediates transfer of maternal resources to  
4 offspring – is under complex epigenetic control. We show here that plant-specific RNA  
5 Polymerase IV mediates parental control of endosperm gene expression. Pol IV is required for  
6 the production of small interfering RNAs that typically direct DNA methylation. We compared  
7 small RNAs, DNA methylation, and mRNAs in *A. thaliana* endosperm from reciprocal  
8 heterozygotes produced by crossing wild-type plants to Pol IV mutants. We find that maternally  
9 and paternally acting Pol IV have divergent effects on endosperm. Losses of maternal and  
10 paternal Pol IV impact sRNAs and DNA methylation at distinct genomic sites. Strikingly,  
11 maternally and paternally-acting Pol IV have antagonistic impacts on gene expression at some  
12 loci, divergently promoting or repressing endosperm gene expression. Antagonistic parent-of-  
13 origin effects have only rarely been described and are consistent with a gene regulatory system  
14 evolving under parental conflict.

15

## 1 Introduction

2 Parents influence zygotic development in viviparous plant and animal species. In  
3 flowering plants, parent-of-origin effects on offspring development are observed in an embryo-  
4 surrounding seed tissue called the endosperm (Gehring & Satyaki, 2017). Endosperm does not  
5 contribute genetic material to the next generation but mediates maternal nutrient transfer to the  
6 embryo, coordinates growth between the embryo and maternal tissues, sets seed dormancy  
7 and regulates germination, and acts as a nutrient store to support seedling growth (Jing Li &  
8 Berger, 2012). Endosperm is typically triploid and develops from the fertilization of a diploid  
9 female gamete, called the central cell, by one of two haploid sperm cells that are released by  
10 pollen. Violations of the balanced ratio of two maternal to one paternal genomes disrupts  
11 normal endosperm development in a parent-of-origin dependent manner (Milbocker & Sink,  
12 1969; Müntzing, 1936; Povilus et al., 2018; Scott et al., 1998; Stoute et al., 2012). In some *A.*  
13 *thaliana* accessions, crosses between tetraploid mothers and diploid fathers exhibit reduced  
14 endosperm proliferation and smaller mature seeds while reciprocal crosses where the fathers  
15 are tetraploid (paternal excess crosses) exhibit prolonged endosperm proliferation and larger or  
16 aborted seeds. These parent-of-origin effects on endosperm development have been  
17 interpreted under the aegis of the parental conflict or kinship model (Haig, 2013). According to  
18 this model, when a mother mates with more than one father, the inclusive fitness of the mother  
19 is optimal when her resources are equally distributed among her progeny. The inclusive fitness  
20 of the father is optimal when his progeny are able to acquire more maternal resources than  
21 other half-siblings. Such conflicts are postulated to lead to arms races whose impacts may be  
22 observed in the molecular machinery mediating parental control. However, our understanding of  
23 the impact of conflict on endosperm biology is limited by our incomplete understanding of  
24 molecular and genetic mechanisms guiding parental control of endosperm development.

25 Recent data indicate that mutations in RNA Polymerase IV have effects on reproduction,  
26 endosperm, and seed development in multiple species (Erdmann et al., 2017; Grover et al.,  
27 2018; Kirkbride et al., 2019; Martinez et al., 2018; Satyaki & Gehring, 2019; Wang et al., 2020).  
28 RNA Pol IV functions as part of the RNA directed DNA methylation (RdDM) pathway, in which it  
29 produces relatively short, non-coding transcripts that are converted into double stranded RNA  
30 by RDR2 (Blevins et al., 2015; S. Li et al., 2015; Zhai et al., 2015) . These double-stranded  
31 RNAs are cleaved into 24nt small RNAs (sRNAs) by DCL3 and single strands are loaded into  
32 ARGONAUTE proteins that help target the *de novo* DNA methyltransferase DRM2, which acts  
33 in conjunction with RNA Pol V and several other proteins, to methylate DNA (Matzke & Mosher,

1 2014). *NRPD1*, which encodes the largest subunit of RNA Pol IV, has roles in endosperm gene  
2 dosage control. Endosperm gene expression typically reflects the ratio of two maternally and  
3 one paternally inherited genomes, such that for the majority of genes approximately two-thirds  
4 of genic transcripts are derived from maternal alleles (Gehring et al., 2011; Pignatta et al.,  
5 2014). A survey of allele-specific gene expression in *nRPD1* mutant endosperm found that Pol IV  
6 is required to maintain the 2:1 maternal to paternal transcript ratio in the endosperm and that  
7 loss of Pol IV leads to the mis-regulation of several hundred genes (Erdmann et al., 2017).  
8 Additionally, loss of function mutations in *NRPD1* or other members of the RdDM pathway can  
9 repress seed abortion in crosses of diploid mothers and tetraploid fathers (Erdmann et al., 2017;  
10 Martinez et al., 2018; Satyaki & Gehring, 2019). In *B. rapa*, loss of *NRPD1*, *RDR2*, or *NRPE1*  
11 results in high rates of seed abortion due to maternal sporophytic effects (Grover et al., 2018).  
12 Loss of Pol IV in both *B. rapa* and in *A. thaliana* also results in smaller seed sizes (Grover et al.,  
13 2018) and RNA Pol IV is essential to post-meiotic pollen development in *C. rubella* (Wang et al.,  
14 2020).

15 Molecular data point to the intriguing possibility that mutations in RNA Pol IV have  
16 parent-of-origin effects on endosperm. A comparison of sRNAs in wild-type whole seeds (which  
17 includes maternal seed coat, endosperm, and embryo) with *NRPD1*<sup>+/-</sup> endosperm from crosses  
18 where the mutation in *NRPD1* was either maternally- or paternally-inherited suggested that loss  
19 of maternal *NRPD1* affected more sRNA loci than the loss of paternal *NRPD1* (Kirkbride et al.,  
20 2019). Although the comparison of sRNAs from wild-type whole seeds to mutant endosperm in  
21 this study makes definitive conclusions difficult to draw, it raises the potential question of if and  
22 how the loss of *NRPD1* has parent-of-origin effects on sRNA production.

23 To examine the impacts of parental Pol IV activity on endosperm in more detail, we  
24 examined sRNA and mRNA transcriptomes in wild-type endosperm, *nRPD1* homozygous mutant  
25 endosperm, and *nRPD1* heterozygous endosperm where the mutant allele was inherited from a  
26 homozygous mutant mother or father. We also examined methylomes in wild-type and  
27 endosperm from the reciprocal heterozygotes. Analysis of these data demonstrate that maternal  
28 and paternal *NRPD1* have distinct parental effects on endosperm, some of which are  
29 antagonistic.

30

31



## 1 Results

### 2 Maternal Pol IV inhibits, whereas paternal Pol IV promotes, interploidy seed abortion

3 We tested if the molecular data supporting distinct functions for Pol IV in the mother and  
4 the father (Kirkbride et al., 2019) could be supported by genetic analyses. We reanalyzed  
5 previously published data (Erdmann et al., 2017) to specifically test the effects of the loss of  
6 maternal Pol IV vs. paternal Pol IV in the context of interploidy, paternal excess crosses (diploid  
7 mother pollinated by tetraploid father). Inheritance of a mutant *nrpd1* allele from diploid mothers  
8 resulted in 4% normal seed in a cross to tetraploid fathers, which was significantly different than  
9 7.1% normal seed observed when wild-type diploid mothers are crossed to wild-type tetraploid  
10 fathers. Crosses between wild-type diploid mothers and tetraploid *nrpd1* fathers resulted in  
11 64.8% normal seed. Paternal rescue by *nrpd1* was diminished when the diploid mother was also  
12 mutant, resulting in 37.5% normal seeds. Thus, we conclude that maternal *NRPD1* promotes  
13 interploidy seed viability and paternal *NRPD1* represses seed viability (Fig. S1). This is  
14 consistent with observations that paternal excess seed viability was promoted by the maternal  
15 activity of *DCL3* and repressed by the paternal activity of *DCL3* (*DCL3* functions downstream of  
16 *NRPD1*) (Satyaki & Gehring, 2019). Interploidy crosses are a sensitive genetic assay to detect  
17 endosperm phenotypic effects. However, paternal excess endosperm displays wide-spread  
18 transcriptomic changes (Satyaki & Gehring, 2019), which make it a poor system to understand  
19 the specific role of RNA Pol IV in endosperm development. Therefore, for all subsequent  
20 experiments we examined endosperm molecular phenotypes in the context of balanced crosses  
21 (diploid x diploid) where either one or both parents were homozygous mutant for the *nrpd1a-4*  
22 allele.

23

### 24 Loss of maternal or paternal Pol IV activity impacts small RNAs at distinct sites

25 To determine the role of Pol IV in sRNA production in the endosperm, we first identified  
26 Pol IV-dependent endosperm sRNAs. Previously we showed that 24 nt sRNAs were the  
27 predominant sRNA species in endosperm and exhibited a broader distribution over genes and  
28 transposable elements (TEs) than in other tissues (Erdmann et al., 2017). We profiled small  
29 RNA populations in three replicates of endosperm derived from crosses of *Ler nrpd1* females  
30 pollinated by *Col-0 nrpd1* males (7 days after pollination) and compared them with our

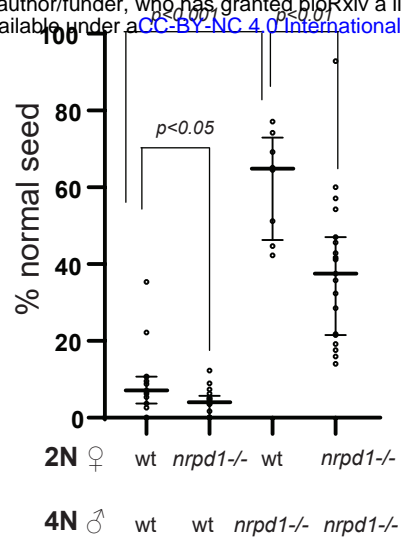

**Figure S1: Maternal and paternal Pol IV activity have opposing effects on paternal excess seed abortion.** Loss of maternal Pol IV decreases paternal excess seed viability while loss of paternal Pol IV increases seed viability. Each dot in the aligned dot plot represents seed viability from one paternal excess cross (biological replicate). Significance of difference between indicated crosses was calculated by Wilcoxon test.

1 previously published sRNA libraries from Ler x Col-0 wild-type F<sub>1</sub> endosperm (female parent in  
2 cross written first) (Erdmann et al., 2017) (Supplementary Table 1).

3 We identified 21,131 sRNA peaks in wild type endosperm using ShortStack (Axtell,  
4 2013). 76.9% of these were predominantly populated by 24nt sRNAs, with 1.1%, 0.2%, and  
5 2.2% of peaks dominated by 23, 22, or 21 nt sRNAs, respectively. An additional 19.7% of peaks  
6 were either dominated by a non-canonical sRNA size or had no predominant size class (Fig.  
7 S2A). The majority of sRNAs were genetically dependent on *NRPD1*, with 99% of 24nt sRNA  
8 peaks, 94.87% of 22nt sRNA peaks and 70.1% of 21nt sRNA peaks absent in *nripd1*-/  
9 endosperm (Fig. S2B). To enable downstream comparisons to expression, we binned sRNAs by  
10 size (21 to 24 nt) and calculated read counts overlapping TEs and genes encoding proteins,  
11 miRNA, and other ncRNA. We used DESeq2 (Love et al., 2014) to separately identify genes  
12 and TEs with significant differences in Pol IV-dependent sRNA populations. Consistent with the  
13 peak-based analysis, loss of RNA Pol IV abolished 21-24 nt small RNAs at most TEs and  
14 genes, while most miRNAs were not impacted (Supplementary Table 2). 21-23 nt sRNAs were  
15 often lost at the same loci as 24 nt sRNAs (Fig. S2C), suggesting that sRNAs of differing sizes  
16 arose from the same Pol IV transcript in the wild-type but were likely processed into RNAs  
17 shorter than 24 nt by different downstream DICERs or by the exosome components *Atrimmer1*  
18 and 2 (Daxinger et al., 2009; Ye et al., 2016). Pol IV-dependent 21-23 nt sRNAs have been  
19 identified in other tissues, indicating this finding is not specific to endosperm (Panda et al., 2020;  
20 Wang et al., 2020; Wu & Zheng, 2019).

21 After identifying Pol IV-dependent sRNAs, we asked whether loss of one parent's Pol IV  
22 influenced the abundance of Pol IV-dependent sRNAs in *nripd1* heterozygous endosperm. We  
23 sequenced small RNAs from two replicates of Ler female x Col-0 *nripd1*-/ male (referred to as  
24 pat *nripd1*+/-) endosperm and three replicates of Ler *nripd1*-/ female x Col-0 male (referred to  
25 as mat *nripd1*+/-) endosperm. Because the endosperm is triploid, in these comparisons there  
26 are 3 (wild-type), 2 (pat *nripd1*+/-), 1 (mat *nripd1*+/-) and 0 (*nripd1*-/) functional *NRPD1* alleles in  
27 the endosperm. However, *NRPD1* is a paternally expressed imprinted gene in wild-type Ler x  
28 Col endosperm and the single paternal allele contributes 62% of the *NRPD1* transcript whereas  
29 38% comes from the two maternal alleles (Pignatta et al., 2014). Consistent with paternal allele  
30 bias in *NRPD1* expression, mRNA-Seq data shows that *NRPD1* is expressed at 42% of wild-  
31 type levels in pat *nripd1*+/- and at 91% of wild-type levels in mat *nripd1*+/- (Supplementary Table  
32 6).

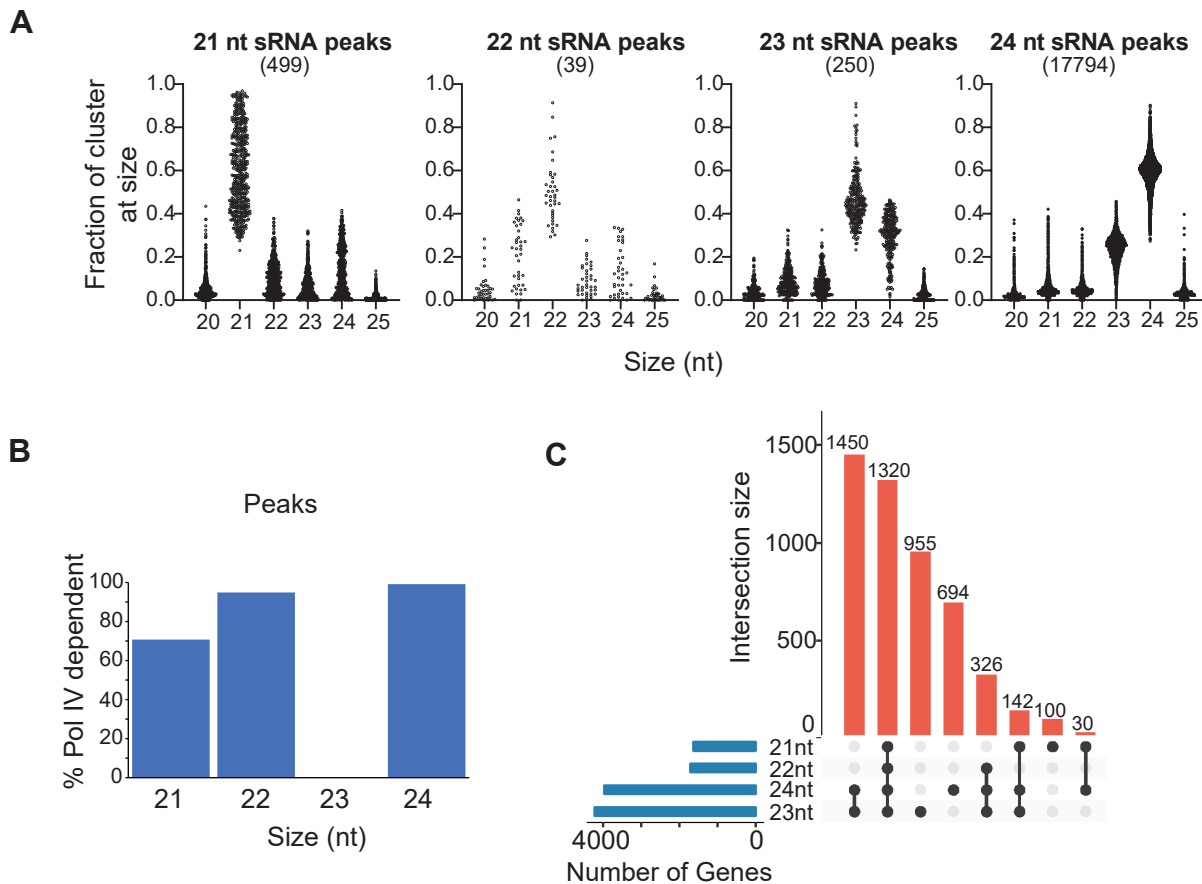

**Figure S2. RNA Pol IV is necessary for the production of 21-24 nt sRNAs in the endosperm. (A)** Size (nt) of all sRNAs in endosperm small RNA peaks dominated by 21, 22, 23, or 24 nt sRNAs. ShortStack was used to call peaks in wild-type (*Ler* x *Col-0*) endosperm. Each peak is grouped into a size class based on the predominant size of the small RNA species in that cluster. Fraction of small RNAs at other sizes at the same peaks are plotted. **(B)** Small RNA peaks of multiple sizes are impacted by loss of *NRPD1*. Genome-wide small RNA coverage over 300 bp windows overlapping by 200 bp was calculated. DESeq2 was used to identify windows with differentially expressed sRNAs between WT and *nrpd1*<sup>-/-</sup>. Overlapping windows were merged. Peaks overlapping windows with reduced expression in *nrpd1*<sup>-/-</sup> were classified as Pol IV- dependent peaks. **(C)** Upset plot shows that genes losing sRNAs of one size classes lose sRNAs of other size classes in *nrpd1*<sup>-/-</sup> endosperm.

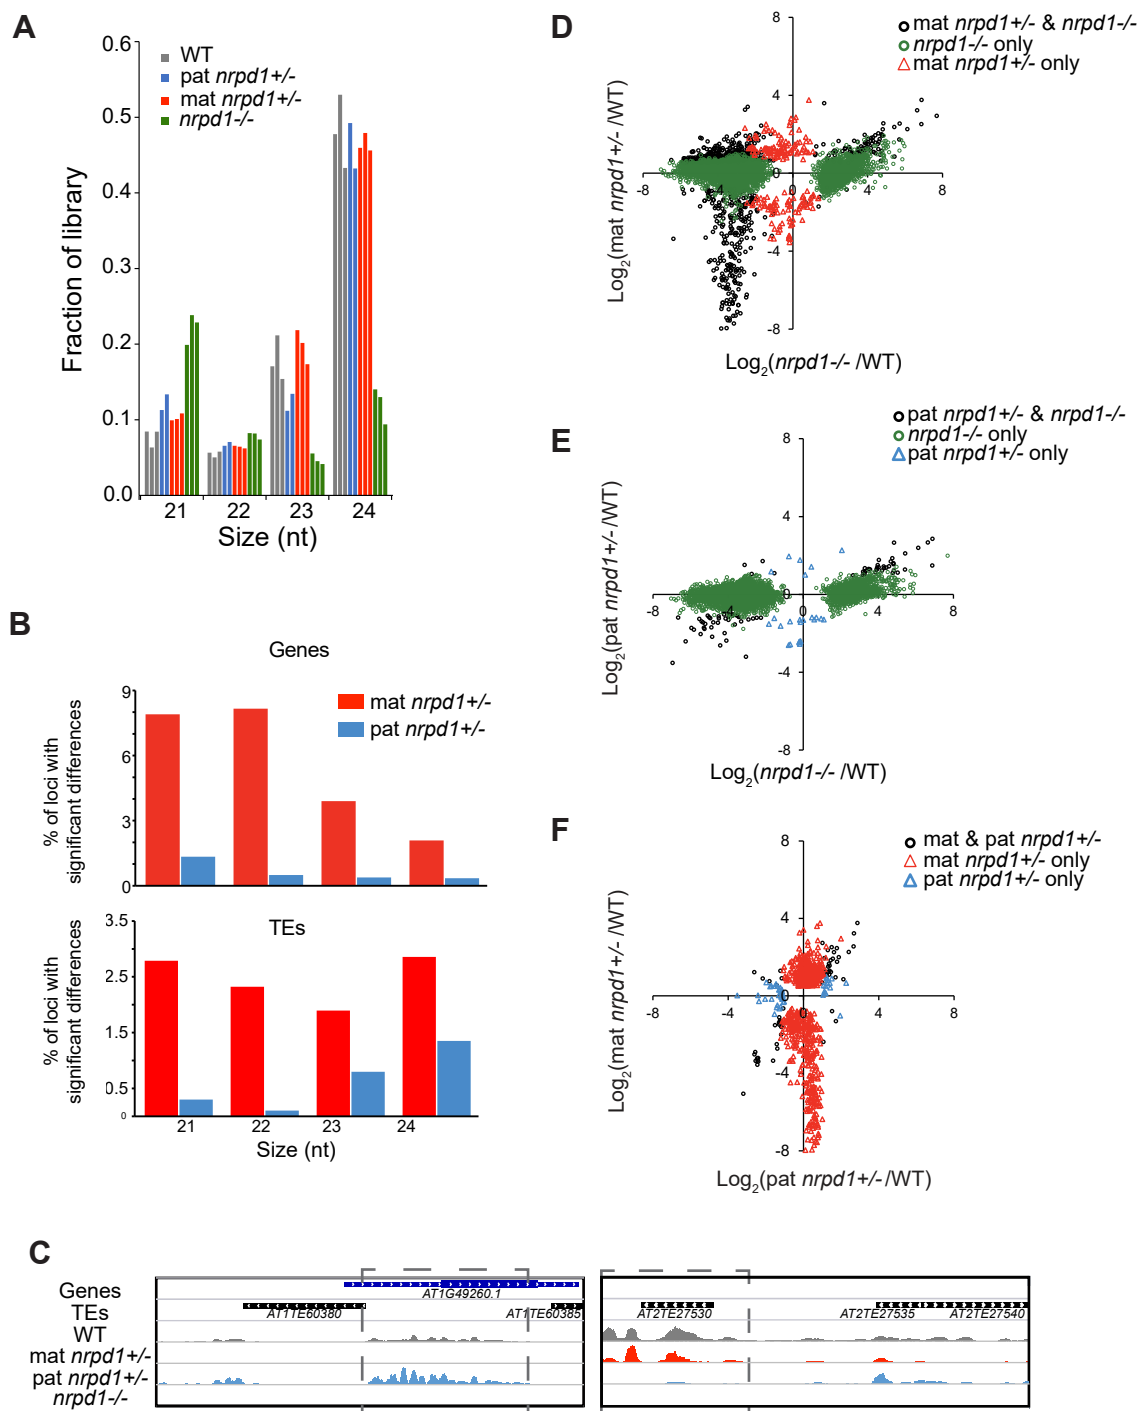

**Fig. 1: Impact of loss of maternal, paternal, or both copies of *NRPD1* on endosperm small RNAs. (A)** Loss of maternal or paternal *NRPD1* does not substantially alter the endosperm small RNA pool. Fraction of aligned small RNA reads in each size class in the indicated genotypes. **(B)** Examination of 21-24 nt sRNAs over genes or TEs shows that inheriting a mutant maternal *nrpd1* allele has a larger impact than inheriting a mutant paternal *nrpd1* allele. Percent of loci showing at least a two-fold reduction in sRNA abundance and  $p_{adj} < 0.05$  according to DESeq2 are indicated in red (*mat nrpd1+/-*) or blue (*pat nrpd1+/-*). Genes and TEs included in this tally have a normalized wild-type read count of five or higher. **(C)** Snapshots of loci with Pol IV-dependent 24 nt sRNAs that show a specific loss of small RNAs in *mat* (left) or *pat* (right) *nrpd1+/-* endosperm. **(D-F)** Comparisons of genic 24 nt sRNAs upon loss of maternal, paternal, or both copies of *NRPD1*. Fold change as calculated by DESeq2. Only significant changes ( $q < 0.05$ ) are plotted.

**A** bioRxiv preprint doi: <https://doi.org/10.1101/2021.03.24.436774>; this version posted August 25, 2021. The copyright holder for this preprint (which was not certified by peer review) is the author/funder, who has granted bioRxiv a license to display the preprint in perpetuity. It is made available under aCC-BY-NC 4.0 International license.

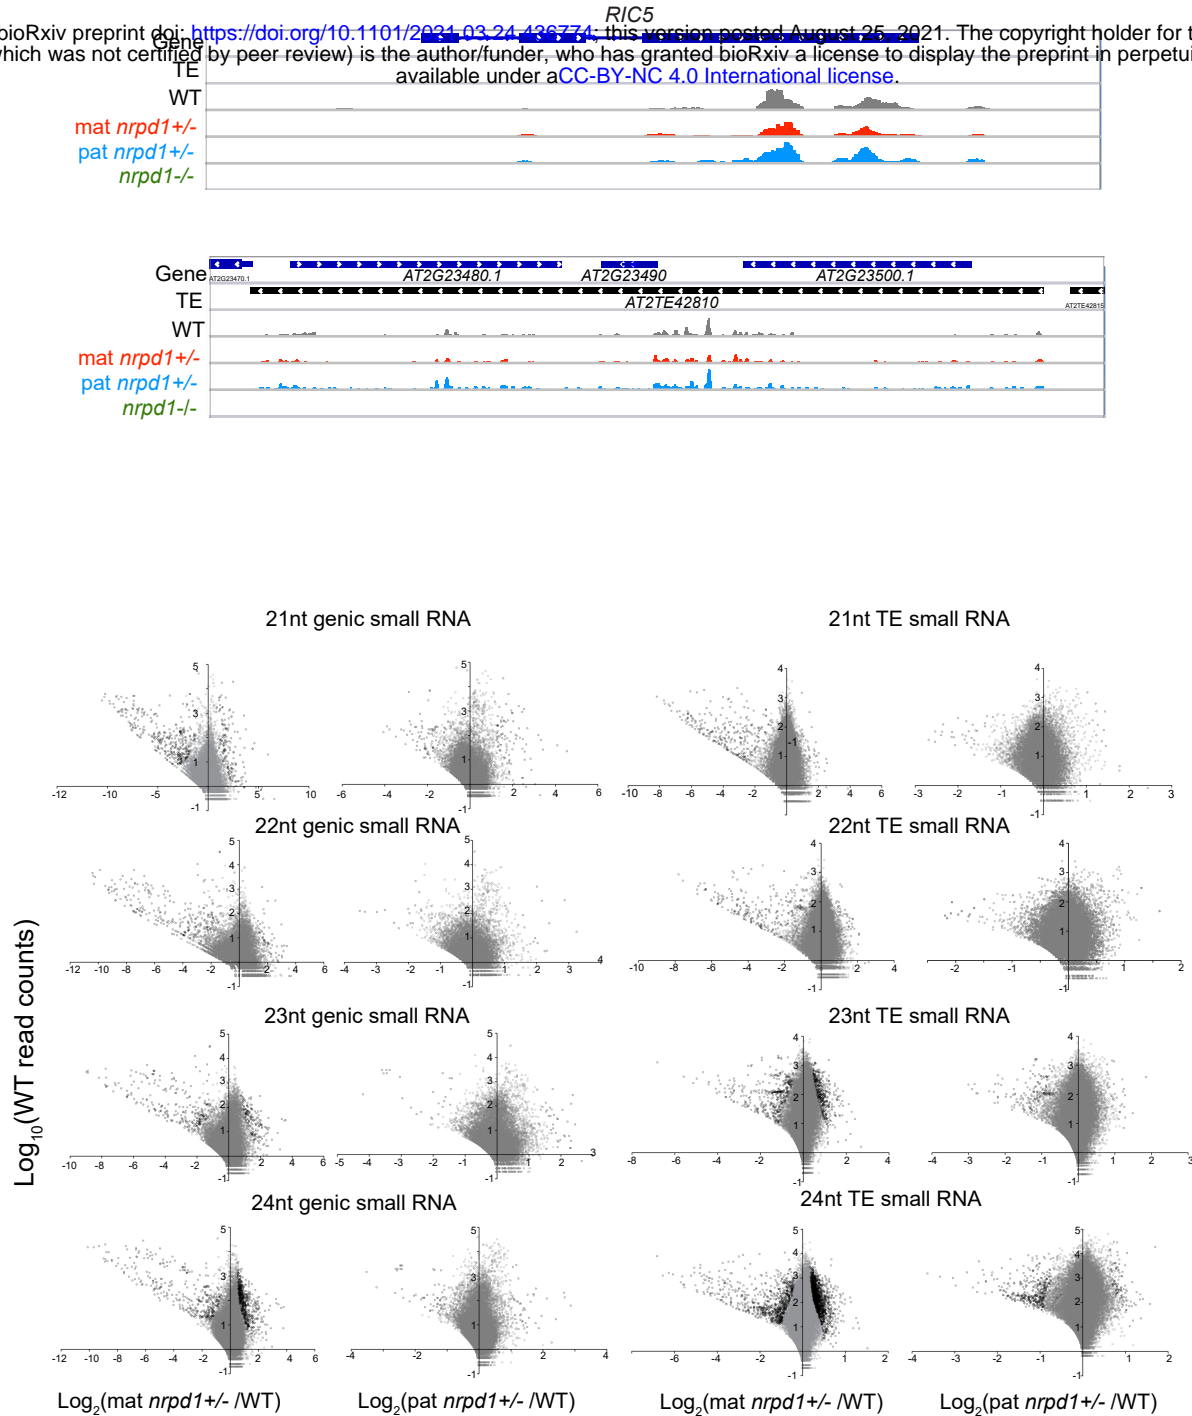

**Figure S3: Impact of the loss of maternal and paternal *NRPD1* on the endosperm small RNA population.** (A) One parent's copy of *NRPD1* is sufficient for 24 nt sRNA production from genes and TEs at most loci, here exemplified by *RIC5* and a VANDAL21 copy. (B) Examination of 21-24 sRNA over genes and TEs shows that inheriting a maternal mutation in *NRPD1* has a greater impact than inheriting a paternal mutation in *NRPD1*. Loci with differential sRNA expression were identified using DESeq2. Wild-type (WT) read counts represent average read counts per locus across three replicates. Reads mapping to TE insertions were normalized using genic sRNA expression. Black circles represent  $padj \leq 0.05$ . Gray circles represent  $padj > 0.05$ .

1           We found that the presence of functional *NRPD1* inherited from either parent is sufficient  
2 for the biogenesis of nearly wild-type levels of 21-24 nt sRNAs in endosperm (Fig. 1A, Fig. S3).  
3 However, although the overall sRNA population in the heterozygotes was similar to the wild-type  
4 (Fig. 1A), loss of maternal and paternal *NRPD1* had distinct impacts on sRNA at individual loci  
5 (Fig. 1B-F, Fig. S3, Table S2-3). We identified genes and transposable element (TE) insertions  
6 that displayed at least a two-fold change in the abundance of sRNAs in mat or pat *nrpd1+/-*  
7 compared to the wild-type (Fig. 1B-F, Fig. S3, Tables S2-3). Loss of paternal *NRPD1* caused  
8 relatively small fold-change reductions in 21-24 nt Pol IV sRNAs at a handful of loci, while loss  
9 of maternal *NRPD1* had slightly greater yet limited impact (Fig. 1B-F, Fig. S3, Table S2-3). For  
10 genic loci with *NRPD1*-dependent 24 nt sRNAs, 2% (327 genes) had significantly lower  
11 abundance in mat *nrpd1+/-* compared to wild-type; in contrast 0.3% (60 genes) were  
12 significantly lower in pat *nrpd1+/-* (Fig. 1B). For TE loci with *NRPD1*-dependent 24 nt sRNAs,  
13 2.8% (545 TE insertions) and 1.35% (261 TE insertions) exhibited significantly lower abundance  
14 in mat and pat *nrpd1+/-*, respectively (Fig. 1B). Few of the loci with reduced sRNAs were shared  
15 between the reciprocal heterozygotes – of 327 24nt sRNA-expressing genic loci that were  
16 reduced by more than two-fold in mat *nrpd1+/-*, only 22 were also reduced by two-fold in pat  
17 *nrpd1+/-* (Fig. 1F). Moreover, there was no quantitative or correlative relationship between loci  
18 affected in mat *nrpd1+/-* and pat *nrpd1+/-* (Fig. 1F). Thus, the vast majority of sRNA-producing  
19 loci in endosperm only require at least one functional copy of *NRPD1* after fertilization.

## 20 **Evaluating memory of parental Pol IV activity and endosperm sRNA production**

21           The absence of dramatic differences in sRNAs in heterozygotes could indicate that the  
22 alleles inherited from both the wild-type and the *nrpd1-/-* parent produce a wild-type level of  
23 sRNAs after fertilization. This result would be expected for a recessive mutation without parental  
24 effects. However, it is known that Pol IV activity at some loci requires prior Pol IV activity  
25 (Jingwen Li et al., 2020). Under such a scenario, Pol IV activity in the parents before fertilization  
26 might be necessary for sRNA production from that parent's allele in the endosperm after  
27 fertilization. Thus, the observed lack of differences in sRNA production at most loci in  
28 heterozygous *nrpd1* endosperm (Fig. 1) could be explained by an upregulation of sRNA  
29 production from the alleles inherited from the wild-type parent (i.e. sRNAs are upregulated from  
30 paternal alleles in mat *nrpd1+/-* and maternal allele sRNAs are upregulated in pat *nrpd1+/-*  
31 endosperm). To distinguish between these possibilities, we used the SNPs between Col-0 and  
32 Ler to identify the allelic origins of small RNAs in WT and heterozygous endosperm. We first  
33 confirmed prior observations that Pol IV sRNAs are biallelically expressed at most loci in

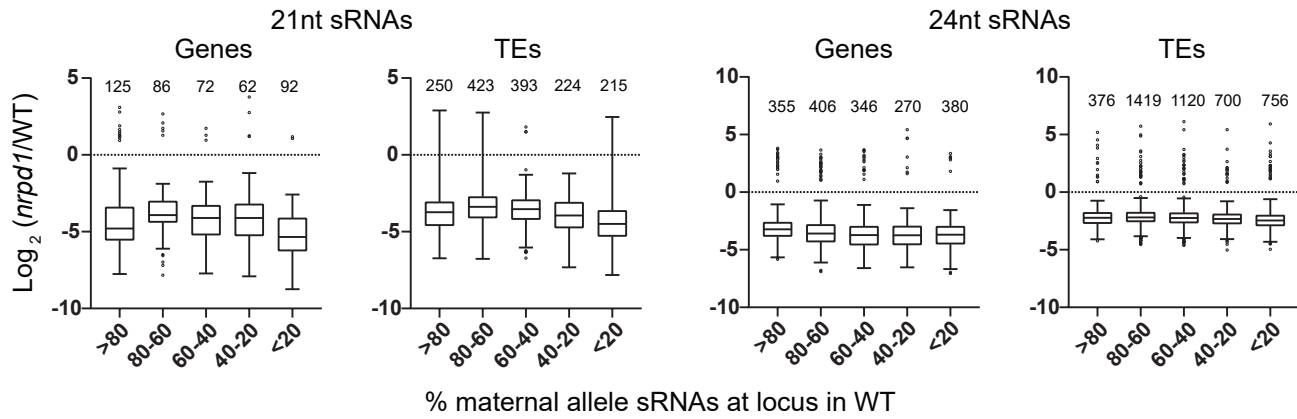

**Figure S4: RNA Pol IV-dependent small RNAs arise from both maternal and paternal alleles.** SNPs between Col-0 and *Ler* were used to identify parental origins of small RNAs arising from genes and transposable elements (TEs). Differentially expressed loci were identified using DESeq2 as described in Figure 1. Loci with a sum of at least ten allele-specific reads in three wild-type *Ler* x Col-0 replicates and showing significant differences in 21nt and 24 nt sRNAs in *Ler nrpd1*<sup>-/-</sup> x Col-0 *nrpd1*<sup>-/-</sup> endosperm were included. Box plots are Tukey plots. Numbers over box plots are number of loci evaluated.



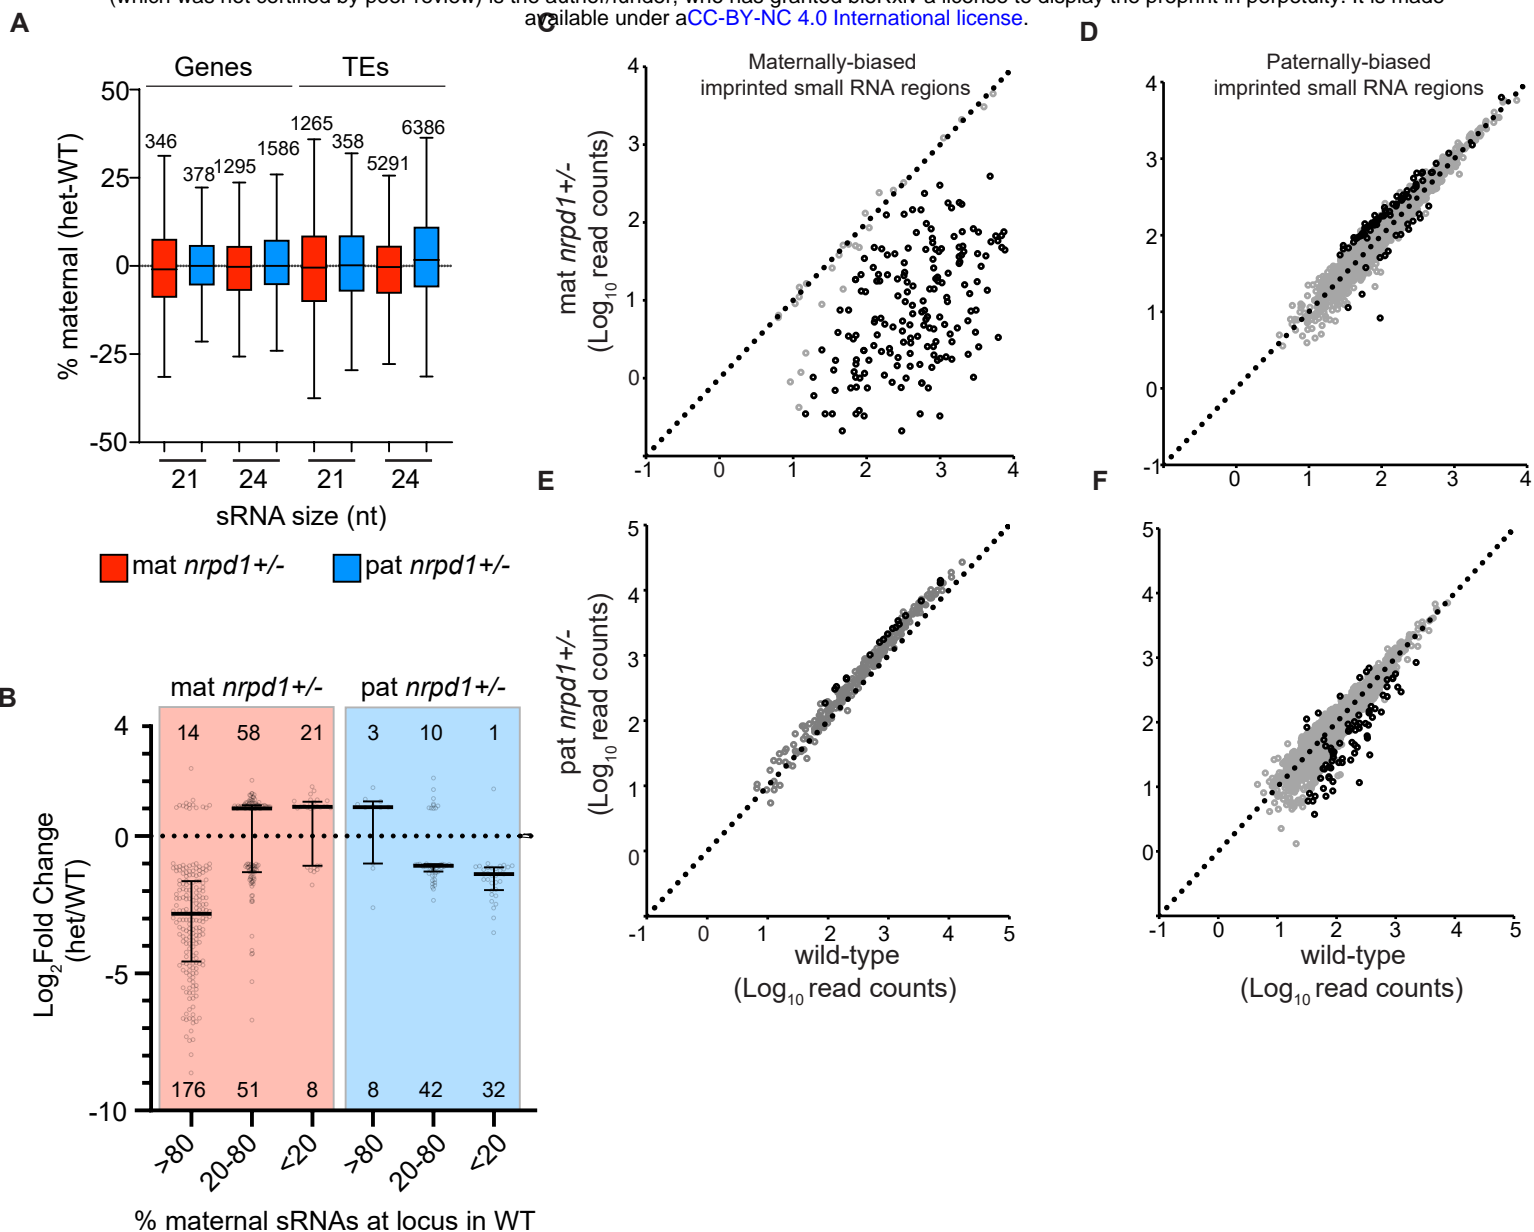

**Figure 2: Effects of loss of maternal or paternal Pol IV on the allelic origin of small RNAs.** (A) Tukey plot shows no difference in allelic origin of genic and TE small RNAs between heterozygotes and wild-type. Loci plotted here show similar abundances in wild-type and heterozygotes and have a sum of at least ten allele-specific reads in three wild-type replicates and in heterozygotes. (B) Loci with reduced sRNAs in *mat nrpd1*+/- or *pat nrpd1*+/- exhibit maternally- or paternally-biased sRNAs in WT. Genes and TE showing differential abundance of 24 nt sRNAs in *nrpd1* heterozygotes were grouped into bins by the % of sRNAs produced from the maternal alleles of that locus in WT. Fold-change was calculated by DESeq2. Tukey plot represents fold-change in each group. Circles show fold-change at individual loci. Numbers below and above plot are total number of loci having significantly lower and higher abundance of 24nt sRNAs in *nrpd1*+/- relative to the wild-type. (C-F) Loss of maternal *NRPD1* leads to a reduction in the abundance of sRNAs from maternally-biased ISRs (imprinted small RNA region) (C) and gain of sRNAs from a subset of paternally-biased ISRs (D). Loss of paternal *NRPD1* has a negligible impact on maternally-biased ISRs (E) and a relatively minor impact on paternally-biased ISRs (F). Col-Ler imprinted sRNA regions used here were defined in Erdmann *et al* (2017). These regions have less expression in seed coat relative to endosperm. To identify regions with changes in small RNA abundance, read counts were calculated over sliding windows of 300bp with 200bp overlap. Windows with differential abundance were identified using DESeq2. Windows overlapping an ISR were identified using bedtools intersect. Overlapping windows were merged using bedtools merge and the median read-count for each set of merged windows was plotted. Windows with and without significant differences in abundance are represented by black and grey circles.

1 endosperm and predominantly expressed from one parental allele, or imprinted, at several  
2 hundred others (Erdmann et al., 2017). Examining sRNAs at genes and TEs, we found that both  
3 bi-allelically expressed 21 and 24 nt sRNA loci (defined as between 20% and 80% of sRNAs  
4 from maternally-inherited alleles) and those predominantly expressed from one parental allele  
5 (>80% or <20% maternal) were Pol IV-dependent (i.e. their accumulation was significantly  
6 reduced in *nprpd1*<sup>-/-</sup> endosperm) (Fig. S4).

7 To test if sRNA production from alleles inherited from wild-type parents compensated for  
8 alleles inherited from an *nprpd1*<sup>-/-</sup> parent, we first assessed several thousand loci that were not  
9 significantly mis-regulated in *nprpd1*<sup>+/-</sup> endosperm. Overall, there were similar contributions from  
10 maternal and paternal alleles in mat and pat *nprpd1* heterozygotes compared to wild-type  
11 endosperm (Fig. 2A). This suggests that by 7 DAP (days after pollination), at most loci in the  
12 endosperm, sRNAs are produced from both maternal and paternal alleles regardless of whether  
13 the alleles were inherited from a wild-type parent or an *nprpd1*<sup>-/-</sup> parent. However, we found that  
14 imprinted sRNA regions (ISRs) (113.1KB maternally imprinted and 1215.6KB paternally  
15 imprinted regions overlapping both genic and TE loci.) (Erdmann et al., 2017) were impacted by  
16 loss of parental Pol IV (Fig 2C-F). 179 of 206 ISRs where expression is maternally biased in WT  
17 showed reduced 24 nt sRNAs in mat *nprpd1*<sup>+/-</sup> (Fig. 2C). ISR loci have been filtered to remove  
18 regions that are also enriched for seed coat sRNAs (Erdmann et al., 2017) and thus preclude  
19 analytical artifacts that may arise due to maternal tissue contamination or due to any potential  
20 sRNA movement. On the other hand, only a small subset (74 of 2405 ISRs) of paternally biased  
21 ISRs produced fewer sRNAs in pat *nprpd1*<sup>+/-</sup> and slightly more sRNAs in mat *nprpd1*<sup>+/-</sup>. We also  
22 note that maternally biased regions in wild-type showed slightly elevated production of sRNAs in  
23 pat *nprpd1*<sup>+/-</sup> endosperm and paternally biased regions in wild-type show slightly elevated levels  
24 of sRNAs in mat *nprpd1*<sup>+/-</sup> endosperm (Fig. 2D). Examination of the allelic origins of sRNAs at  
25 genes and TEs are also consistent with the ISR analysis. In a parallel analysis, we found that  
26 small RNA loci showing dramatic reductions in abundance in mat *nprpd1*<sup>+/-</sup> tended to be  
27 maternally biased in wild-type endosperm (>80% of sRNAs from the maternally-inherited  
28 alleles) (Fig. 2B, leftmost column). Similarly, in pat *nprpd1*<sup>+/-</sup>, paternally biased small RNA (<20%  
29 sRNAs from the maternally-inherited alleles) loci were more impacted (Fig. 2B, rightmost  
30 column).

31

32

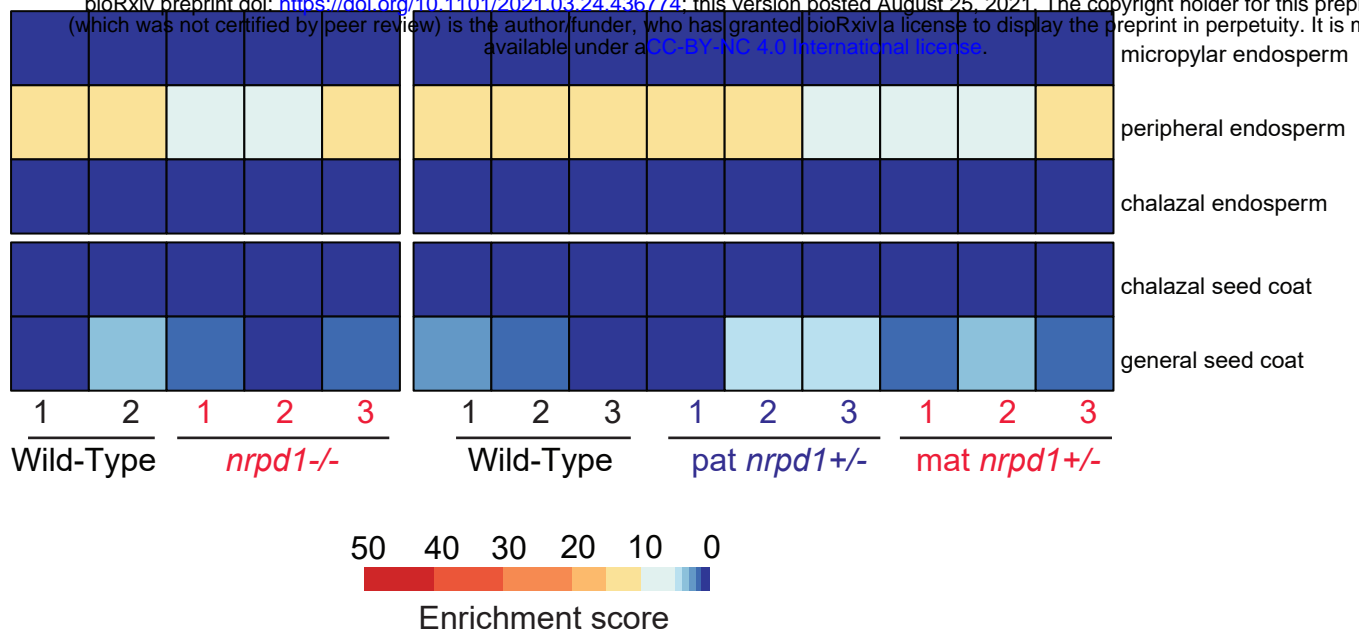

**Figure S5: Tissue enrichment in dissected endosperm shows little seed coat contamination.** For each RNA-Seq library built with RNA from dissected endosperm, reads overlapping genic loci were counted with Htseq-count. Enrichment of a seed tissue in each sample was then calculated using the Tissue enrichment tool (Schon and Nodine, 2017).

1 In summary, these results indicate that imprinted sRNA loci in endosperm are dependent  
2 on Pol IV activity in the parents and are not established *de novo* post-fertilization. Notably, these  
3 sites of Pol IV action are by definition distinct between maternal and paternal parents.

#### 4 **Maternal and paternal RNA Pol IV have antagonistic impacts on gene expression**

5 We previously identified several hundred genes mis-expressed in *nrpd1*<sup>-/-</sup> endosperm.  
6 To test for maternal or paternal effects on endosperm gene expression, we performed mRNA-  
7 seq in three replicates each of mat *nrpd1*<sup>+/-</sup> and pat *nrpd1*<sup>+/-</sup>, along with appropriate wild-type  
8 controls and homozygous mutant *nrpd1* endosperm (Table S1). Examination of these datasets  
9 using a tissue-specific gene expression tool showed no indication of contamination with seed  
10 coat tissue (Figure S5). Differential expression analyses identified 1791 genes whose  
11 transcripts were more abundant and 1455 that were less abundant in *nrpd1*<sup>-/-</sup> compared to wild-  
12 type endosperm (Fig. 3; Table S6). Almost 50% of these genes (1599) were similarly mis-  
13 regulated in mat *nrpd1*<sup>+/-</sup> (Fig. 3A,B), along with 2998 additional genes. In contrast, very few  
14 genes (90) changed in expression in pat *nrpd1*<sup>+/-</sup> compared to the wild type (Fig. 3A, B). In  
15 addition to the difference in the size of the effect, loss of maternal or paternal Pol IV altered the  
16 expression of different classes of genes. Panther over-representation tests (Mi & Thomas,  
17 2009) indicated that in mat *nrpd1*<sup>+/-</sup>, down-regulated genes were enriched for functions in the  
18 cell-cycle, whereas up-regulated genes were enriched for functions in photosynthesis, stress  
19 response, and abscisic acid signaling. In pat *nrpd1*<sup>+/-</sup>, up-regulated genes were enriched for  
20 functions in heat stress response, while down-regulated genes were enriched for functions in  
21 responses to fungi. The expression of imprinted genes is known to be regulated epigenetically  
22 in endosperm. 15 paternally expressed and 45 maternally expressed imprinted genes were mis-  
23 regulated in mat *nrpd1*<sup>+/-</sup> while two maternally expressed imprinted genes but no paternally  
24 expressed imprinted genes were mis-regulated in pat *nrpd1*<sup>+/-</sup> (Table S6).

25 Differential expression of a gene between wild-type and *nrpd1*<sup>-/-</sup> could represent: 1)  
26 maternal and paternal effects arising from the loss of *NRPD1* in parents, 2) zygotic effects  
27 arising from epistatic interactions between mat *nrpd1*<sup>-</sup> and pat *nrpd1*<sup>-</sup>, 3) effects from the loss of  
28 all *NRPD1* in the endosperm, or 4) the sum of all three effects. As this study does not examine  
29 the effect of knocking-down *NRPD1* specifically in the endosperm, we can only detect parental  
30 effects. Curiously, 2988 genes mis-regulated in mat *nrpd1*<sup>+/-</sup> were not mis-regulated in *nrpd1*<sup>-/-</sup>  
31 endosperm (Fig. 3A). We hypothesized that genic mis-regulation found exclusively in mat  
32 *nrpd1*<sup>+/-</sup> (but not *nrpd1*<sup>-/-</sup>) was caused by separate transcriptional effects of maternal and  
33 paternal *nrpd1* that were obscured in null mutants. To test this hypothesis, we compared gene

A

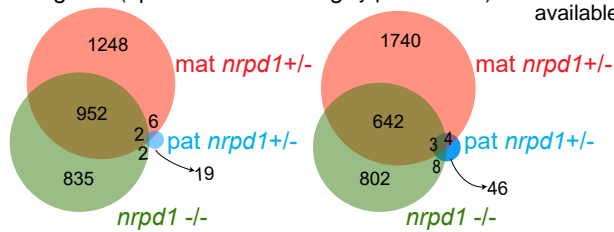

B

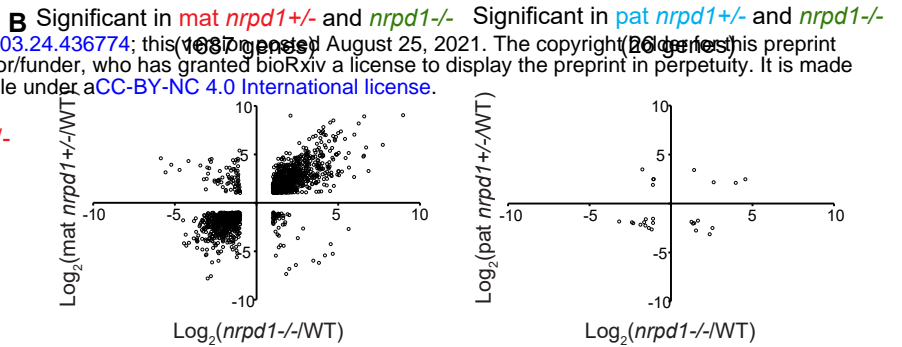

C

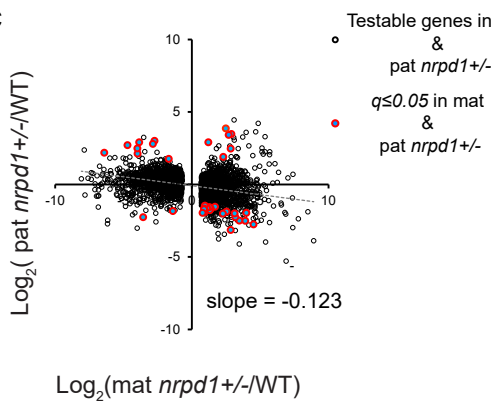

D

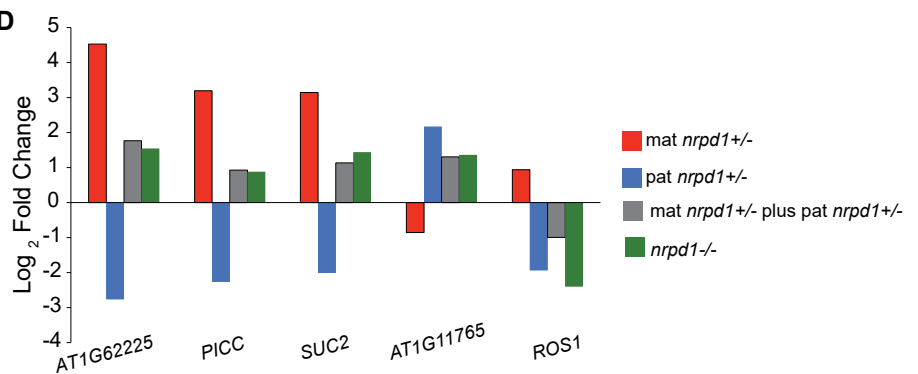

E

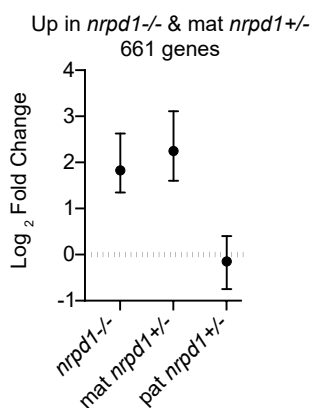

F

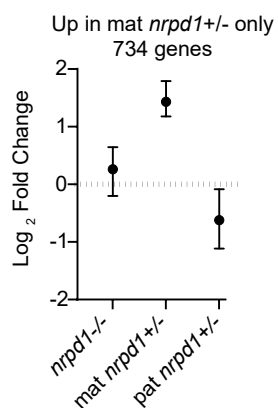

G

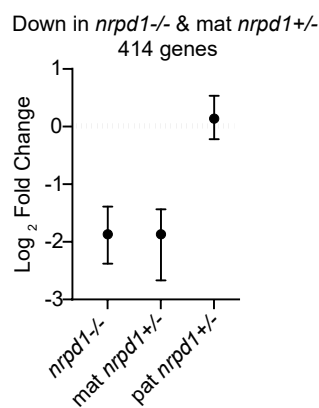

H

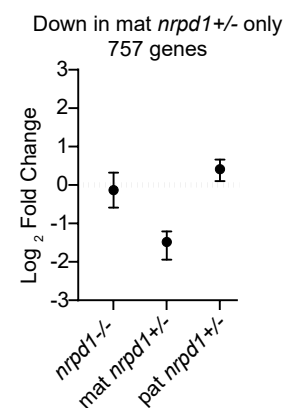

**Figure 3. Maternally and paternally acting Pol IV have antagonistic effects on endosperm gene expression.**

(A) Venn diagrams showing overlap of genes with increased and decreased expression in comparison to wild-type endosperm for the indicated genotypes. (B) Scatter plots of genes that are all significantly different ( $q \leq 0.05$ ,  $\text{Log}_2(\text{Fold Change}) \geq 1$  or  $\leq -1$ ) between wild-type and indicated mutants. Fold-change calculated using Cuffdiff. (C) Inverse correlation between changes in gene expression in mat and pat *nrpd1+/-* relative to WT. Slope was calculated for all testable genes in comparisons of mat and pat *nrpd1+/-* relative to WT. Genes significantly mis-regulated in both mat and pat *nrpd1+/-* are colored circles. (D) Examples of genes that are antagonistically regulated by Pol IV. Grey bars represent mathematical sum of effects observed in mat and pat *nrpd1+/-*. (E) Genes up-regulated at least two-fold in both *nrpd1-/-* and *mat nrpd1+/-* do not exhibit mis-regulation in pat *nrpd1+/-*. (F) Genes up-regulated only in *mat nrpd1+/-* but not *nrpd1-/-* have decreased expression in pat *nrpd1+/-*. (G) Genes down-regulated in both *nrpd1-/-* and *mat nrpd1+/-* are not mis-regulated in pat *nrpd1+/-*. (H) Genes down-regulated only in *mat nrpd1+/-* but not in *nrpd1-/-* are overall slightly increased in expression in pat *nrpd1+/-*. Plots E-H show median and inter-quartile range for  $\text{log}_2$  fold change in mutant/WT. Fold-change were calculated by Cuffdiff.

1 expression between mat and pat *nrpd1*<sup>+/-</sup> (Fig. 3C). We found that 51/90 genes mis-regulated  
2 in pat *nrpd1*<sup>+/-</sup> endosperm were also mis-regulated in mat *nrpd1*<sup>+/-</sup> endosperm (red circles in  
3 Fig. 3C). However, 36 of these 51 genes changed expression in the opposite direction. For  
4 example, expression of the gene *SUC2* decreased about four-fold in pat *nrpd1*<sup>+/-</sup> endosperm  
5 and increased about eight-fold in mat *nrpd1*<sup>+/-</sup> endosperm (Fig. 3D). If *NRPD1* loss has no  
6 endospermic (zygotic) effect on the expression of these genes, then the mis-regulation  
7 observed in *nrpd1*<sup>-/-</sup> endosperm would be the sum of the parental effects. Indeed, the change in  
8 abundance of these genes in *nrpd1*<sup>-/-</sup> endosperm is close to that predicted by an additive,  
9 antagonistic parental effect (compare gray and green bars in Fig. 3D). *SUC2* transcript  
10 abundance in  
11 *nrpd1*<sup>-/-</sup> changes by 2.7-fold compared to the predicted 2.18-fold change, and other genes show  
12 similar effects (Fig. 3D). While the expression of these particular genes showed large effects in  
13 both heterozygotes, most genes mis-regulated in mat *nrpd1*<sup>+/-</sup> did not show a significant  
14 change (>2-fold difference in transcript abundance) in pat *nrpd1*<sup>+/-</sup> endosperm. We therefore  
15 hypothesized that mis-regulation of genes in mat *nrpd1*<sup>+/-</sup> but not *nrpd1*<sup>-/-</sup> endosperm was due  
16 to a small antagonistic effect arising from the loss of pat *NRPD1* in *nrpd1*<sup>-/-</sup>. Indeed, genes mis-  
17 regulated in either mat *nrpd1*<sup>+/-</sup> or pat *nrpd1*<sup>+/-</sup> (Fig. 3C) are overall negatively correlated (slope  
18 = -0.123). To test this hypothesis further, we evaluated the expression of genes in pat *nrpd1*<sup>+/-</sup>  
19 endosperm that were either mis-regulated in both mat *nrpd1*<sup>+/-</sup> and *nrpd1*<sup>-/-</sup> or only in mat  
20 *nrpd1*<sup>+/-</sup>. Transcripts that significantly increased exclusively in mat *nrpd1*<sup>+/-</sup> had slightly  
21 decreased expression in pat *nrpd1*<sup>+/-</sup> endosperm (Fig. 3F). In contrast, genes that were  
22 significantly upregulated in both mat *nrpd1*<sup>+/-</sup> and *nrpd1*<sup>-/-</sup> were not affected in pat *nrpd1*<sup>+/-</sup>  
23 (Fig. 3E). Similarly, genes that showed a significant reduction in abundance only in mat *nrpd1*<sup>+/-</sup>  
24 were slightly higher expressed in pat *nrpd1*<sup>+/-</sup> endosperm (Fig. 3H) while genes with reduced  
25 abundance in both mat *nrpd1*<sup>+/-</sup> and *nrpd1*<sup>-/-</sup> were not affected in pat *nrpd1*<sup>+/-</sup> (Fig. 3G). These  
26 results are consistent with an antagonistic parent-of-origin effect model for the impact of Pol IV  
27 on endosperm transcriptomes. Although the antagonistic effect at most genes is less than the  
28 commonly used two-fold threshold difference for a significant change in gene expression, it is  
29 similar in magnitude to dosage compensation effects in other systems such as that observed for  
30 the fourth chromosome in *D. melanogaster* and for genes mediating genetic compensation in  
31 zebrafish (El-Brolosy et al., 2019; Johansson et al., 2012).

## 32 Evaluating possible mechanisms of Pol IV's impact on gene expression



1           How does Pol IV have parent-of-origin effects on gene expression in the endosperm  
2 after fertilization? Pol IV effects could be direct or indirect at the affected loci. One possibility is  
3 that Pol IV modulates gene expression via the proposed post-transcriptional gene silencing  
4 (mRNA cleavage) or translational inhibition by 21-22nt Pol IV-dependent small RNAs (Jullien et  
5 al., 2020; Panda et al., 2020). Or, Pol IV-dependent RNA-directed DNA methylation over genic  
6 sequences or linked gene regulatory element might repress transcription in the wild type.  
7 Alternatively, Pol IV could impact many genes in *trans* by regulating the expression of chromatin  
8 proteins, like the known target *ROS1* (a DNA demethylase) (Williams et al., 2015), transcription  
9 factors (Kirkbride et al., 2019; Xu et al., 2015), or by broadly influencing genome organization,  
10 which in turn affects gene expression (Rowley et al., 2017; Zhong et al., 2021). To estimate the  
11 contribution of *cis* and *trans* effects and identify potential *cis*-regulatory targets of Pol IV that  
12 could drive wide-spread *trans*-effects, we analyzed the congruence of small RNAs, DNA  
13 methylation, mRNA cleavage patterns, and allele-specific changes driving gene expression  
14 changes in wild-type and mutant endosperm.

#### 15 *Assessing potential mRNA cleavage by Pol IV-dependent sRNAs in endosperm*

16           Pol IV dependent genic sRNAs are proposed to regulate gene expression by cleaving  
17 mRNA (Panda et al., 2020) and we previously demonstrated that endosperm has greater  
18 accumulation of genic sRNAs than other tissues (Erdmann *et al*, 2017). To test if such cleavage  
19 events contribute to endosperm Pol IV-dependent transcript abundance, we first identified  
20 candidate genes that exhibited significantly increased ( $\geq 2$ -fold) mRNA abundance and  
21 significantly decreased 21, 22, or 24 nt sRNA abundance ( $\geq 2$ -fold) in *nrrpd1*<sup>-/-</sup> endosperm (Fig.  
22 S6A-C). This analysis suggested that at least 305 genes or 16% of the genes that increase in  
23 expression in *nrrpd1*<sup>-/-</sup> endosperm were associated with Pol IV dependent sRNAs. To directly  
24 assay if these genic sRNAs drive mRNA cleavage at levels sufficient to alter transcript  
25 abundance at specific loci, we mapped the 5' ends of mRNA from wild-type and *nrrpd1*<sup>-/-</sup>  
26 endosperm mRNA using NanoPARE sequencing (Schon et al., 2018). NanoPARE maps both  
27 the 5' ends of primary transcripts and those that result from mRNA cleavage. We confirmed that  
28 NanoPARE sequencing was working for us by identifying transcriptional start sites as well as  
29 internal cleavage sites for known miRNA targets (Fig. S6E). We found that almost all genes  
30 exhibiting increased mRNA abundance also exhibited increased 5' ends at transcriptional start  
31 sites, but did not have reduced 5' ends internal to gene (Fig. S6D). This was confirmed by visual  
32 observation of individual loci (Fig. S6E). This suggests that the increase in the transcript  
33 abundance of these genes in *nrrpd1*<sup>-/-</sup> is not caused by reduced mRNA cleavage. Only five

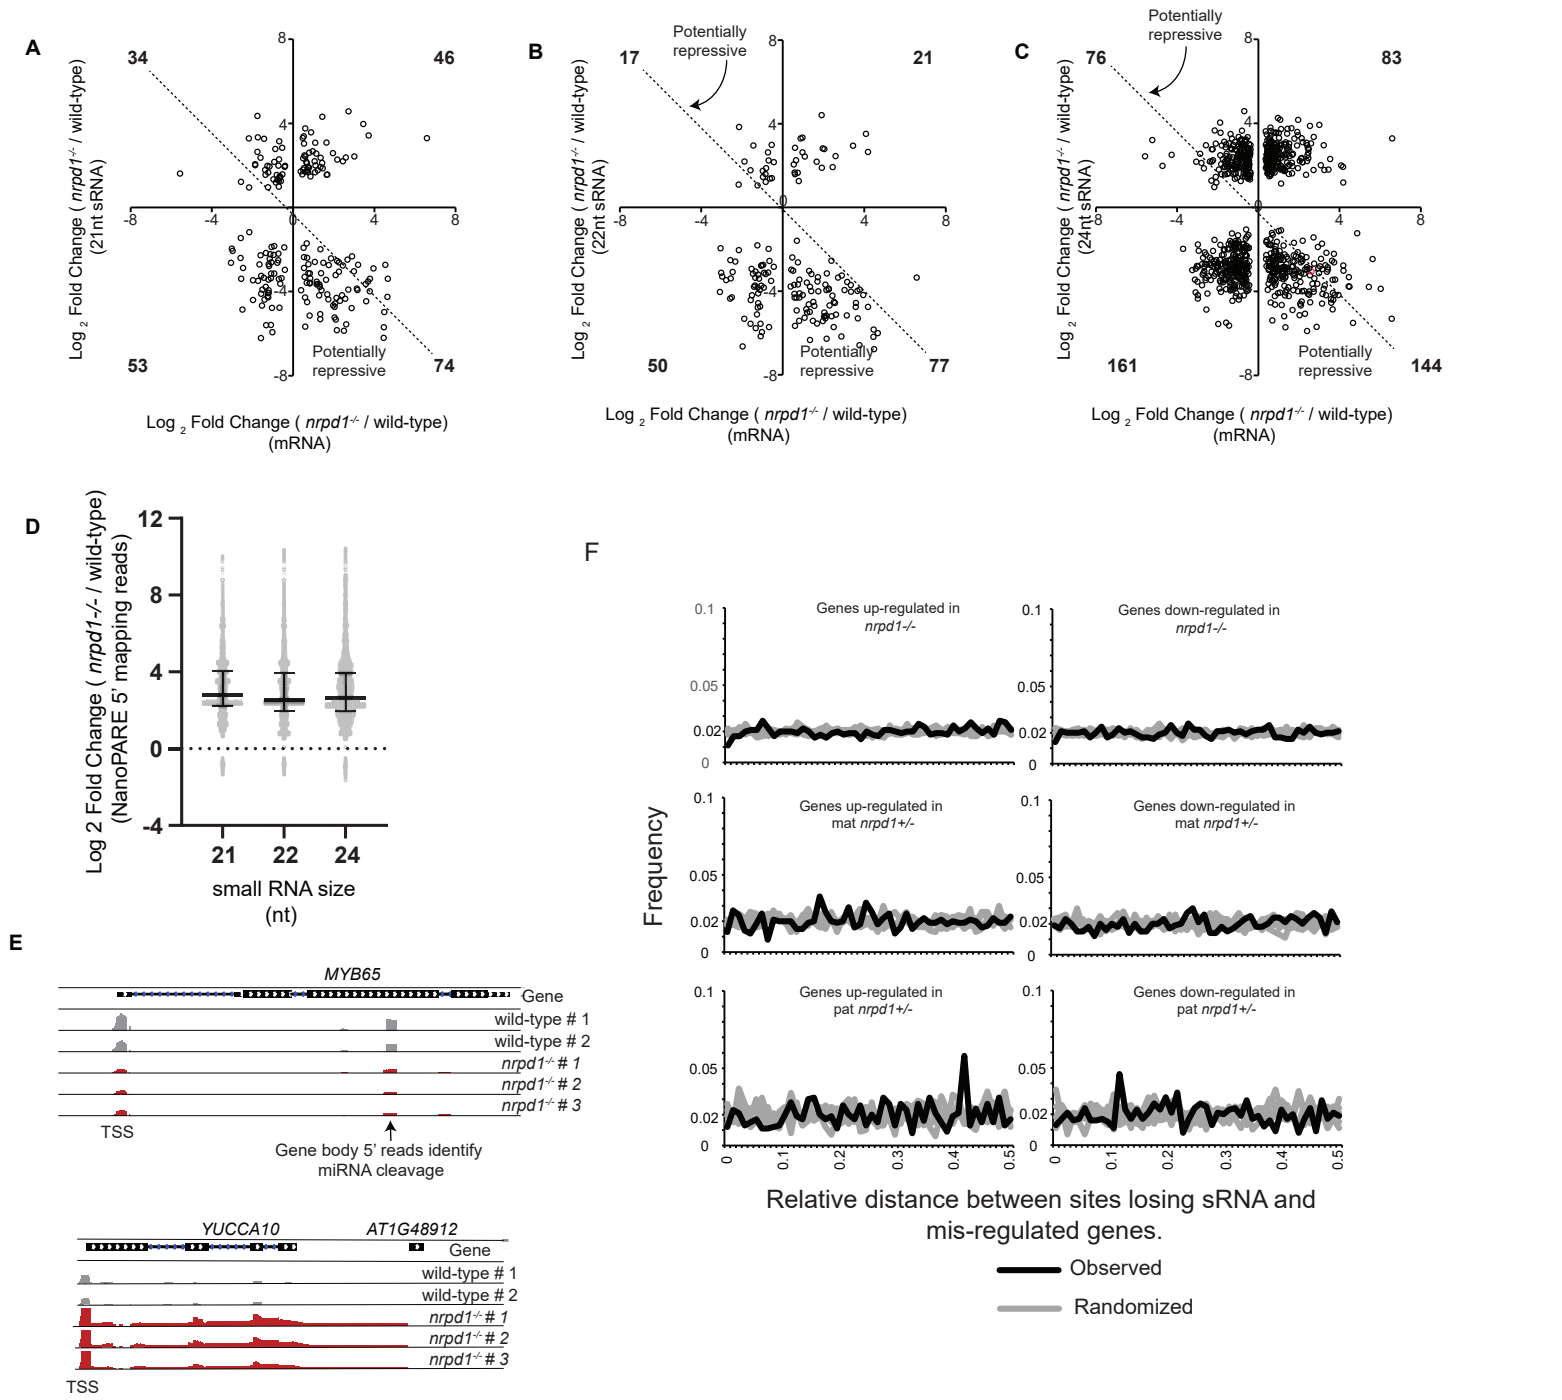

**Figure S6: Little relationship between Pol IV sRNAs and gene regulation.**

**A-C)** Comparisons of genes showing significant differences in 21, 22, 24nt sRNA and mRNA abundance shows that only a subset of genes (lower right quadrant) may be repressed by Pol IV-dependent small RNAs in wild-type. Differences in small RNA abundance between wild-type and *nrpd1*<sup>-/-</sup> were calculated using DESeq2. Differences in mRNA were calculated using Cuffdiff. Numbers in bold in each quadrant indicate number of genes. **D)** NanoPARE data maps 5' ends of transcripts and identifies transcriptional start sites (TSS) and cleavage sites within the gene body. Change in mRNA cleavage at genes that show increased mRNA abundance and decreased 21, 22 or 24 nt sRNA size. Coverage of 5' reads from NanoPARE sequencing was calculated for every nucleotide in the genome. Difference in 5' read coverage at each nucleotide was calculated for two replicates of wild-type (*Ler* x *Col-0* endosperm) and three *nrpd1*<sup>-/-</sup> (*Ler nrpd1*<sup>-/-</sup> x *Col-0 nrpd1*<sup>-/-</sup>) replicates using DESeq2. Each point plotted on the dot plot represents one nucleotide with differential 5' reads overlapping a gene. A single gene may thus have more than one 5' read mapping region. **E)** Examination of NanoPARE data from two replicates of wild-type and *nrpd1*<sup>-/-</sup> correctly identifies a documented miR159 cleavage site in *MYB65* but identifies no difference in putative cleavage of the *YUCCA10* transcript. *YUCCA10* was chosen as an example because it shows increased mRNA abundance and reduced small RNA abundance in *nrpd1*<sup>-/-</sup>. **F)** The relative distance metric shows no significant correlation between mis-regulated genes and sites losing small RNAs in *nrpd1*<sup>+/-</sup> and *nrpd1*<sup>-/-</sup>. Relative distance was calculated using bedtools. Black line indicates relative distance between sites losing sRNA (identified by DESeq2 by examination of readcounts over 300bp windows) and mis-regulated genes. Grey lines represent 5 replicates of equivalent number of random sites in the genome and mis-regulated genes. A uniform frequency of about 0.02 indicates no major correlation between the two data-sets. 5896, 1720 and 790 sites lost sRNAs in *nrpd1*<sup>-/-</sup>, *mat nrpd1*<sup>+/-</sup> and *pat nrpd1*<sup>+/-</sup> respectively. The relative choppiness of the the distribution in *pat nrpd1*<sup>+/-</sup> is likely driven by the smaller number of sites being compared.



1 genes – *PERK8*, *GLP2A*, *ETTIN*, *AAD3* and *AT2G45245* – exhibited reduced cleavage at a few  
2 sites in *nrpd1*<sup>-/-</sup> endosperm. This minimal effect is contrary to the expectation that candidate  
3 genes described above should have reduced cleavage and suggests that small RNA mediated  
4 post-transcriptional gene silencing is not a key mechanism for Pol IV to control endosperm gene  
5 expression. We therefore did not test if mRNA cleavage is impaired in *nrpd1*<sup>+/-</sup> heterozygotes.

#### 6 *Assessing correspondence between sRNA and mRNA changes*

7 Only a minority of the genes that have altered expression in *nrpd1* endosperm have  
8 associated changes in sRNAs within those same genes (Fig. S6A-C). However, Pol IV sRNAs  
9 may also act at sites proximal to a gene to regulate it. We assessed the distance between mis-  
10 expressed genes and altered sRNAs in homozygous and heterozygous *nrpd1* mutant  
11 endosperm. We found that 9.2%, 11.7% and 3.3% of mis-regulated genes are within 1 kb of a  
12 site that loses sRNAs in *nrpd1*<sup>-/-</sup>, mat *nrpd1*<sup>+/-</sup>, and pat *nrpd1*<sup>+/-</sup> endosperm, respectively  
13 (Table S7). To obtain a genome-wide perspective not focused on arbitrary distance cutoffs, we  
14 used the relative distance metric to test if genomic regions losing 24nt sRNAs were associated  
15 with mis-regulated genes. The relative distance metric describes the spatial correlation between  
16 sRNA intervals and mis-regulated genes, compared to mis-regulated genes and random  
17 intervals (Favorov et al., 2012). This analysis found no enrichment in the association between  
18 Pol IV dependent sRNAs and mis-regulated genes in any of the genotypes (Fig. S6F).

#### 19 *Assessing correspondence between DNA methylation and mRNA changes*

20 The relevant molecular function of RNA Pol IV with regard to gene expression is typically  
21 assumed to be its role in RdDM. To identify potential examples of DNA methylation mediating  
22 Pol IV's impact on genes, we performed bisulfite sequencing of WT, mat *nrpd1*<sup>+/-</sup>, and pat  
23 *nrpd1*<sup>+/-</sup> endosperm DNA. We evaluated wild-type DNA methylation at individual cytosines  
24 within Pol IV sRNA-producing genes that were mis-regulated in *nrpd1*<sup>-/-</sup>, mis-regulated genes  
25 that showed increased sRNAs in *nrpd1*<sup>-/-</sup> (Pol IV independent), and five control sets of genes  
26 that showed no change in sRNA abundance upon loss of Pol IV. We found that most cytosines  
27 were not methylated (median is near zero) in the genes we examined (Fig. S7A). This suggests  
28 that Pol IV small RNAs do not generally target DNA methylation at genes. However, some mis-  
29 regulated genes with Pol IV dependent sRNAs had higher CG methylation in wild-type  
30 endosperm (Fig. S7A). These mis-regulated genes with Pol IV dependent sRNAs were also  
31 likely to be longer (Fig. S7B). Longer genes have higher small RNA read counts (Fig. S7C) and  
32 thus differences in these genes are more likely to be called as statistically significant by DESeq2

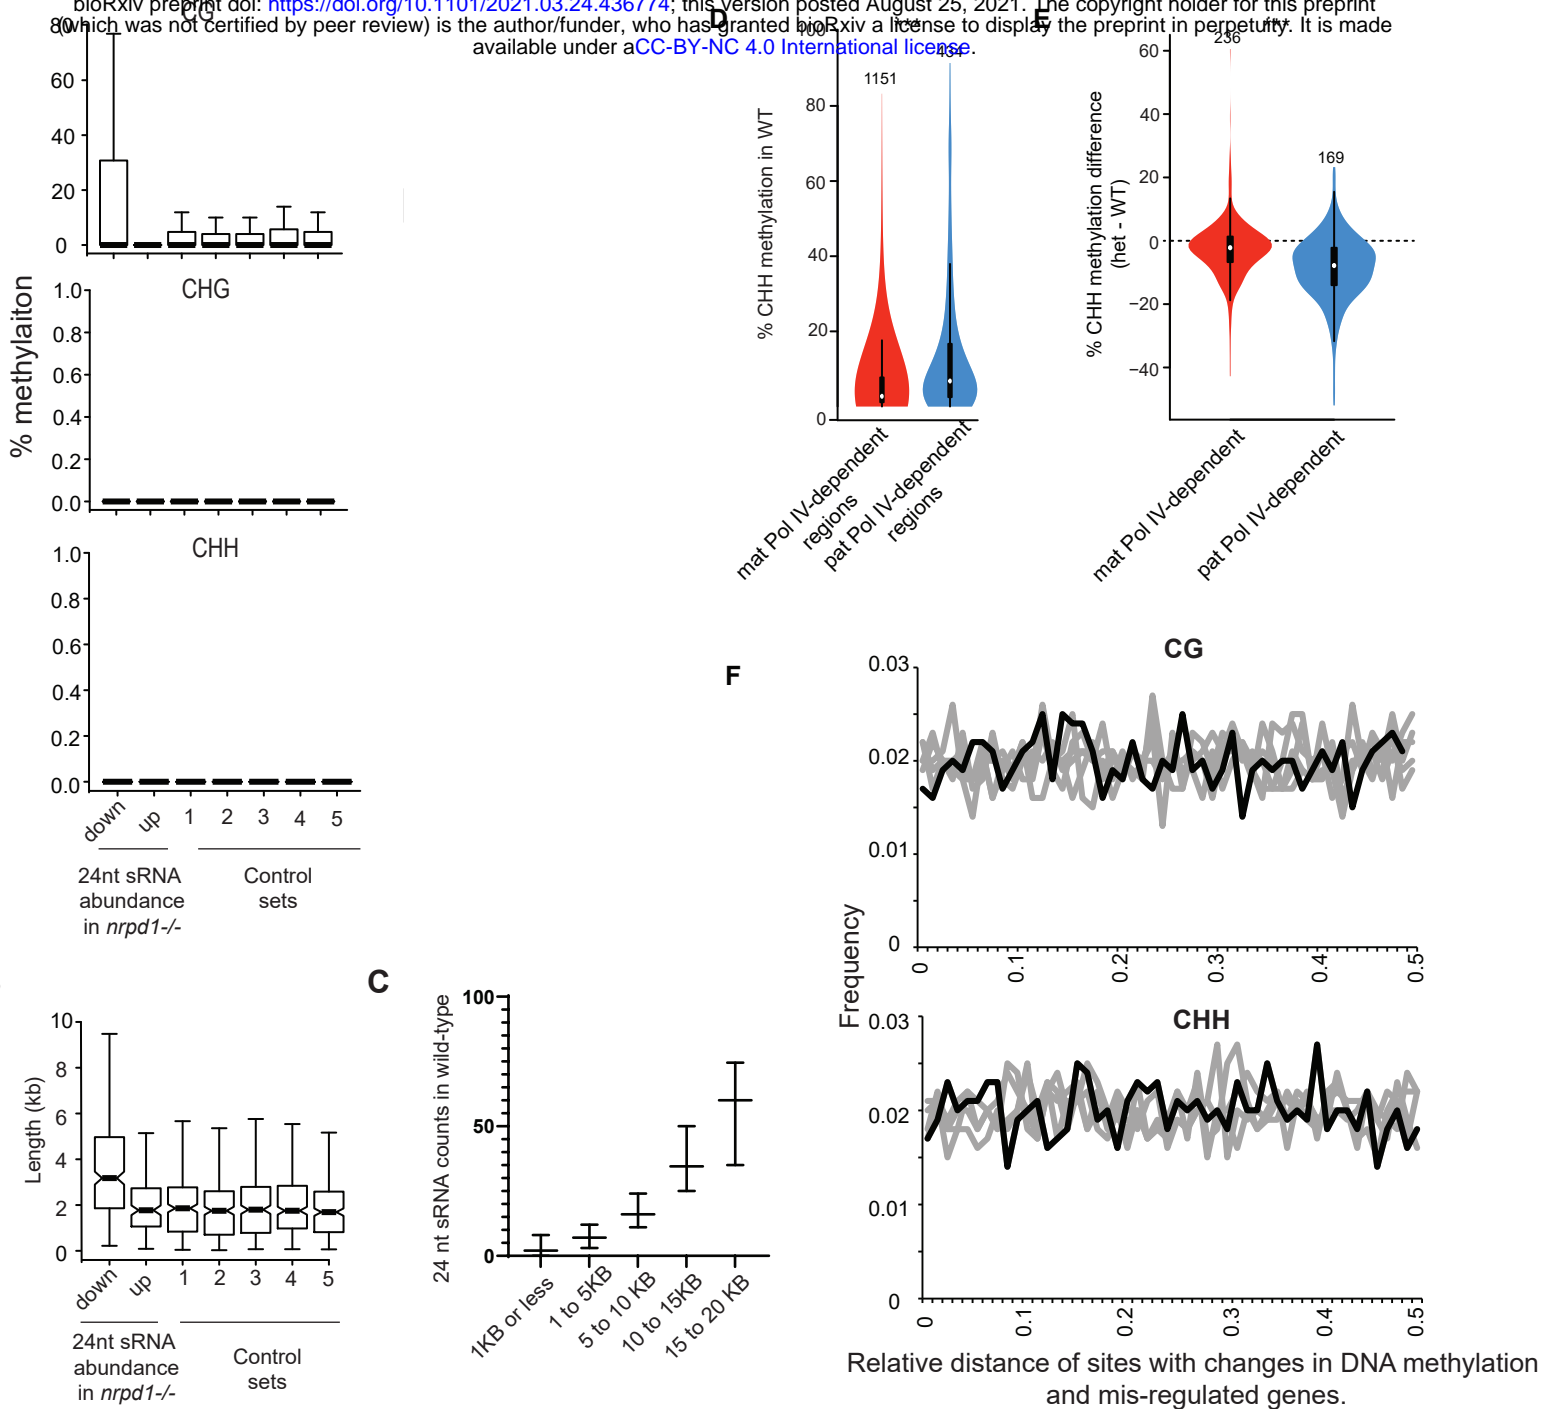

**Figure S7: No relationship between DNA methylation changes and genic mis-regulation in *nrpd1*<sup>+/-</sup>.** (A) Comparison of methylation in CG, CHG and CHH contexts at individual cytosines within genes in wild-type. Cytosines in the first two columns on the left lie within mis-regulated genes whose sRNA abundances are up or down in *nrpd1*<sup>-/-</sup>. The control sets include cytosines within five randomly selected sub-set of genes that show no changes in mRNA abundance in *nrpd1*<sup>-/-</sup>. (B) Genes with fewer sRNAs in *nrpd1*<sup>-/-</sup> and mis-regulated expression tend to be longer. (C) Longer genes have more total 24 nt sRNAs in wild-type endosperm. (D) Wild-type CHH methylation at sRNA producing sites that are dependent on maternal or paternal Pol IV. Methylation is significantly higher at paternal Pol IV-dependent sites. (E) Effects of parental Pol IV loss on CHH methylation at regions with parental Pol IV-dependent sRNAs and greater than 10% CHH methylation in WT. Red, difference between *mat nrpd1*<sup>+/-</sup> and WT; blue, difference between *pat nrpd1*<sup>+/-</sup> and WT. Small RNA producing regions impacted in paternal *nrpd1*<sup>+/-</sup> have higher losses of CHH methylation. For D and E, CHH methylation was calculated for 300bp sliding windows with a 200 bp overlap. CHH methylation windows overlapping windows losing small RNAs in *nrpd1*<sup>+/-</sup> endosperm were identified and merged using bedtools; maximum CHH methylation among merged windows was used for violin plot. \*\*\* represents a statistically significant difference as calculated by Wilcoxon test ( $p < 0.001$ ). Boxplot in the violin plot shows median and inter-quartile range. (F) The relative distance metric shows no significant correlation between mis-regulated genes and sites with changes in CG and CHH DNA methylation in *mat nrpd1*<sup>+/-</sup>. Relative distance was calculated using bedtools. Black line indicates relative distance between mis-regulated genes and sites with differences in DNA methylation between wild-type and *mat nrpd1*<sup>+/-</sup> (identified by Bismark). Grey lines represent relative distance between 5 replicates of random sites in the genome and mis-regulated genes. A uniform frequency of about 0.02 indicates no major correlation between the two data-sets.

1 (Oshlack & Wakefield, 2009). Longer genes also tend to have higher CG methylation (Takuno &  
2 Gaut, 2012; Zilberman et al., 2007). We therefore argue that this increased CG methylation is  
3 an analytical artifact. Our results suggest that Pol IV dependent genic sRNAs do not regulate  
4 endosperm gene expression by directing genic DNA methylation, consistent with our previous  
5 findings (Erdmann et al., 2017).

6 We also tested if changes in DNA methylation brought about by loss of parental Pol IV  
7 could explain changes in gene expression. Overall, loss of parental Pol IV had only minor  
8 effects on DNA methylation (Table S5). Loss of Pol IV activity primarily reduces asymmetric  
9 CHH methylation (Stroud et al., 2013). Comparison of mat *nrpd1*<sup>+/-</sup> and pat *nrpd1*<sup>+/-</sup> CHH  
10 methylation with wild-type endosperm identified 2234 and 2056 DMRs (covering 812.7 Kb and  
11 759.9Kb, respectively) with 50% hypomethylated in mat *nrpd1*<sup>+/-</sup> and 54.8% hypomethylated in  
12 pat *nrpd1*<sup>+/-</sup> (Table S5). Consistent with the parent-of-origin effects described for mRNAs and  
13 sRNAs, we made three observations that suggest that mat and pat Pol IV activity have distinct  
14 impacts on the endosperm methylome. First, only 50% of CHH DMRs are shared between the  
15 two heterozygous genotypes. Second, regions where sRNA accumulation is dependent on  
16 paternal inheritance of a wild-type *NRPD1* allele have higher CHH methylation in wild-type  
17 endosperm than regions where sRNAs are dependent on maternal *NRPD1* (Fig. S7D). This  
18 pattern is consistent with our previous finding that maternally-biased small RNAs are often not  
19 associated with methylated DNA in wild-type endosperm (Erdmann et al., 2017). Third, an  
20 examination of regions with at least 10% CHH methylation in wild-type endosperm shows that  
21 loss of paternal *NRPD1* had a more substantial impact on endosperm CHH methylation than  
22 loss of maternal *NRPD1* (Fig. S7E).

23 Symmetric CG and CHG methylation are typically less affected by loss of *NRPD1*  
24 because other mechanisms exist to maintain this type of methylation. Comparison of CHG  
25 methylation between wild-type and either heterozygote identified fewer than 100 DMRs and  
26 CHG methylation was not investigated further. Both mat and pat *nrpd1*<sup>+/-</sup> endosperm exhibited  
27 changes in CG methylation compared to the wild type (Table S5). In mat *nrpd1*<sup>+/-</sup> endosperm,  
28 48.5% of DMRs (of a total 600 DMRs spanning 207 kb) were hypomethylated relative to wild-  
29 type while in pat *nrpd1*<sup>+/-</sup> 60% of DMRs (of a total 707 DMRs spanning 258 KB) were  
30 hypomethylated relative to wild-type. Further, we found that few of the sites hypo- or hyper-  
31 methylated in the CG context in mat *nrpd1*<sup>+/-</sup> were shared with those changing methylation  
32 state in pat *nrpd1*<sup>+/-</sup> (Table S5).

1 We used the DMRs in the analysis described above to assess their impact on gene  
2 expression. In mat *nrpd1*<sup>+/-</sup> endosperm, 2.6% and 3.4% of total mis-regulated genes are within  
3 one kb of assayable regions with less or more CHH methylation in mat *nrpd1*<sup>+/-</sup> endosperm  
4 (Table S7). In addition, two genes and one gene are within one kb of a region that has higher  
5 and lower CHH methylation in pat *nrpd1*<sup>+/-</sup>. One gene is associated with increased CG  
6 methylation in pat *nrpd1*<sup>+/-</sup>. We also used relative distance analysis to see if mat *nrpd1*<sup>+/-</sup> mis-  
7 regulated genes are more likely to be associated with DNA methylation changes (there are too  
8 few genes associated with DNA methylation changes in pat *nrpd1*<sup>+/-</sup> to perform this analysis).  
9 Consistent with previous analyses, we find no clear relationship between DNA methylation  
10 changes and gene expression changes in the mat *nrpd1*<sup>+/-</sup> endosperm (Fig. S7F).

#### 11 *Allelic analysis of mis-regulated genes to identify cis or trans effects of Pol IV*

12 One method to assess whether Pol IV's impacts on gene expression are predominantly  
13 *cis* or *trans* acting is to compare the allelic origins of mRNA in wild-type and *nrpd1*<sup>+/-</sup>  
14 endosperm. If a gene's mRNA abundance in the endosperm is determined by the activity of Pol  
15 IV in *cis* either in the gametophyte or sporophyte, then the gene would be primarily mis-  
16 regulated from the allele inherited from a parent lacking Pol IV. Thus, in mat *nrpd1*<sup>+/-</sup>  
17 endosperm, mis-regulation of such genes would be driven predominantly by changes in  
18 expression from maternal alleles whereas genes expression differences in pat *nrpd1*<sup>+/-</sup>  
19 endosperm would be driven by changes in expression from paternal alleles. In contrast, the  
20 predominance of *trans* effects would be indicated by both parental alleles contributing to the  
21 changes in the abundance of transcript levels at most genes. We utilized SNPs between Col-0  
22 (paternal) and Ler (maternal) genomes to identify allele-specific mRNA-seq reads. We  
23 evaluated the contributions of each parent's alleles in the endosperm for 2372 mis-regulated  
24 genes that had at least ten allele-specific reads in wild-type and *nrpd1*<sup>+/-</sup>. For the majority of  
25 genes, mis-regulation in mat *nrpd1*<sup>+/-</sup> was driven by effects on expression of both maternal and  
26 paternal alleles, with some notable exceptions (Fig. S8A). For example, increased expression of  
27 *DOG1* in mat *nrpd1*<sup>+/-</sup> was primarily driven by increased expression from maternal alleles (Fig.  
28 S8B). *AT4G12870* was repressed in mat *nrpd1*<sup>+/-</sup> primarily due to a loss of maternal allele  
29 expression (Fig. S8B). In contrast, expression of *SAC2* was primarily repressed in mat *nrpd1*<sup>+/-</sup>  
30 because of decreased expression from the paternal allele (Fig. S8B). Overall, both maternal and  
31 paternal alleles made equal contributions to genic mis-regulation in the mat *nrpd1*<sup>+/-</sup>  
32 endosperm. 4.7% of down-regulated genes and 5.3% of up-regulated genes showed at least a  
33 20% increase or decrease in maternal allele contribution. This was roughly similar to the

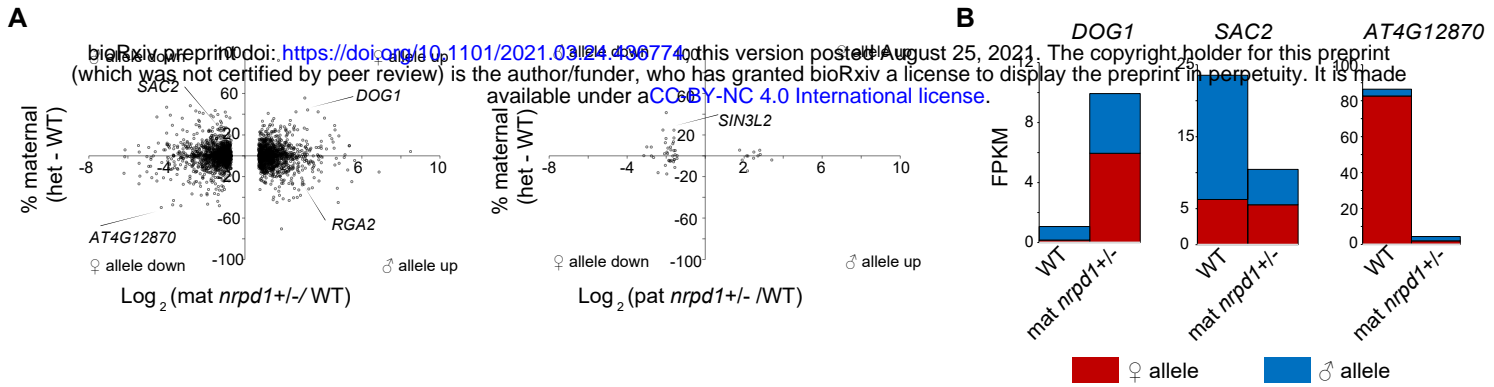

**Figure S8: Impact of parental *NRPD1* on maternal and paternal allele contributions to total gene expression.**

**(A)** Genes were examined to identify those whose expression differences were driven by allele-specific effects. Genes with at least a two-fold, statistically significant difference in expression between the indicated heterozygote and WT and at least ten allele-specific reads in both genotypes were included. The shift in allelic expression was evaluated by subtracting the % maternal-allele transcripts in WT from the heterozygote. Genes within Col-0 introgressions that remain in *Ler nrpd1*<sup>-/-</sup> plants were excluded from all analyses. **(B)** Examples of genes showing allele-specific impacts upon loss of of maternal Pol IV. FPKM and fold-change in (A) and (B) are from Cuffdiff output.

1 contribution of paternal alleles to mis-regulation in mat *nripd1*<sup>+/-</sup>. 4.4% of down-regulated genes  
2 and 5.3% of up-regulated showed at least a 20% change in paternal allele contribution (Fig.  
3 S8A). In pat *nripd1*<sup>+/-</sup>, only 8% of down-regulated genes had lower contribution of paternal  
4 alleles while both alleles contributed to up-regulation (Fig.S8A). Overall, these results suggest  
5 that parental Pol IV's impact on gene expression is largely due to *trans* effects.

6 In summary, our analyses test and dismiss several *cis*-regulatory mechanisms  
7 for how Pol IV may mediate parent-of-origin gene expression effects on the endosperm. We  
8 also individually examined DNA methylation and sRNAs at genes showing antagonistic  
9 regulation by maternally and paternally acting Pol IV and found no evidence for a role for sRNAs  
10 and DNA methylation in their regulation. These results lead us to conclude that parent-of-origin  
11 effects and the antagonistic effects that we observe are likely the result of *trans*-acting effects of  
12 parental Pol IV activity.

## 13 Discussion

14 We demonstrate that Pol IV activity in the father promotes seed abortion in response to extra  
15 paternal genomes, whereas Pol IV activity in the mother promotes seed viability in these  
16 conditions. Previous observations of sRNA or mRNA at individual genes in diploid endosperm  
17 showed that Pol IV function in the mother and the father have different effects on the  
18 endosperm (Kirkbride et al., 2019; Vu et al., 2013). These findings suggested that Pol IV has  
19 differing, and perhaps even opposing, roles in maternal and paternal parents. In this study, we  
20 characterized the effect of maternal and paternal Pol IV activity on the endosperm through  
21 genome-wide analyses of transcription, mRNA cleavage, small RNAs, and DNA methylation in  
22 balanced endosperm. Our molecular data demonstrate that Pol IV activity in the mother and  
23 father have parent-of-origin effects on the endosperm, a subset of which are antagonistic. We  
24 found that one parent's copy of *NRPD1* is sufficient for the production of Pol IV-dependent  
25 sRNAs at most loci, with a small number of largely non-overlapping loci losing sRNAs upon loss  
26 of maternal or paternal *NRPD1*. Pol IV activity in the mother and father also have distinct  
27 impacts on the DNA methylation landscape in the endosperm. Endosperm with a paternally  
28 inherited *nripd1* mutation had lower DNA methylation compared with endosperm where the  
29 *nripd1* mutation was maternally inherited. Finally, an interrogation of gene expression shows that  
30 loss of maternal Pol IV leads to significant mis-regulation of several hundred genes while loss of  
31 paternal Pol IV leads to mis-regulation of only several dozen. A key finding of our study is that  
32 genes that are mis-regulated upon loss of maternal *NRPD1* are affected in an opposite manner  
33 upon loss of paternal *NRPD1*. Together, our results suggest that maternal and paternal Pol IV



1 are genetically antagonistic and that the major effect on transcription observed in heterozygotes  
2 is established before fertilization. These observations are important for understanding both Pol  
3 IV's role in reproduction and the genetic architecture underlying parental control of offspring  
4 development.

#### 5 **Pol IV, conflict, and the genetic architecture of parental control**

6 Parental conflict theory predicts that in viviparous species, mother and father have  
7 antagonistic effects on regulating resource allocation and associated gene expression in  
8 offspring. In practice, such effects are difficult to detect and have been infrequently described.  
9 Antagonistic parental effects are likely to be balanced in the individuals within an inbred  
10 population (like *Arabidopsis*) and are thus unobservable except in mutants or in hybrids where  
11 maternal and paternal effects are out of balance. When homozygous mutants are examined,  
12 these effects may be missed because they do not cause dramatic developmental phenotypes or  
13 because simultaneous loss of antagonistic maternal and paternal effects effectively cancels one  
14 another out. Thus, reciprocal heterozygotes need to be examined to detect antagonistic parent-  
15 of-origin effects. A close examination of our data provides insights into the genetic architecture  
16 mediating parental control of offspring development.

17 A key feature of the regulatory infrastructure that mediates parent-of-origin specific  
18 effects on zygotic gene expression is that maternal and paternal alleles need to be distinguished  
19 from each other in the zygote (in this case, endosperm is the relevant zygote). In *A. thaliana*  
20 endosperm, at many loci maternally inherited alleles are DNA demethylated and marked with  
21 H3K27 methylation by Polycomb Repressive Complex2 (PRC2), while paternally inherited  
22 alleles remain DNA methylated and have reduced H3K27me3 (Borg et al., 2020; Moreno-  
23 Romero et al., 2016; Pignatta et al., 2014). Maternal inheritance of mutations in the PRC2 sub-  
24 units *MEA*, *FIE*, *FIS2* and *MSI1* leads to endosperm defects and seed abortion (Chaudhury et  
25 al., 1997; Grossniklaus, 1998; Kohler, 2003; Ohad et al., 1996). Similarly, inheritance of  
26 maternal mutations in the DNA demethylase *DME* increases DNA methylation on endosperm  
27 maternal alleles and causes seed abortion (Choi et al., 2002). Paternal inheritance of mutations  
28 in these genes have no reported effect on endosperm development or gene expression. These  
29 results thus argued that the solution to the problem of distinguishing parental alleles from one  
30 another after fertilization was to mark maternal and paternal chromosomes with distinct  
31 epigenetic modifications. However, this model may not explain all parent-of-origin effects on  
32 gene expression, particularly outside of imprinted genes. Our study provides evidence for a  
33 distinct model in which the same epigenetic regulator – Pol IV – can mediate both maternal and

1 paternal effects. The only other example of a gene with seemingly antagonistic effects on seeds  
2 is the maintenance methyltransferase *MET1*, whose mutation has opposing effects on seed size  
3 when inherited maternally or paternally, although the molecular basis of this phenotype is  
4 unknown (Xiao et al., 2006).

5         How does Pol IV in the mother and the father have distinct impacts after fertilization? Pol  
6 IV targets can be tissue or developmental stage-specific (Grover et al., 2020) and thus Pol IV  
7 may target different genomic regions during male and female gametogenesis. Pol IV could act  
8 pre- or post-meiotically in the parental sporophyte (diploid phase of the life cycle), in the  
9 gametophyte (haploid phase of life cycle), or post-fertilization in the maternal sporophyte. RT-  
10 PCR based examination of dissected synergids and central cells did not detect *NRPD1*  
11 transcripts (Vu et al., 2013). This suggests that on the maternal side Pol IV influences  
12 endosperm gene expression by acting in the maternal sporophyte or in the female gametophyte  
13 prior to central cell formation. Alternatively, Pol IV could act in the maternal sporophytic  
14 integuments/seed coat after fertilization, when the endosperm is developing. One potential  
15 mechanism for this would be through Pol IV-dependent sRNAs moving from the seed coat to  
16 the endosperm (Grover et al., 2020; Kirkbride et al., 2019). However, examination of the levels  
17 of total Pol IV-dependent sRNAs, allele-specific data, and imprinted sRNA regions suggests that  
18 the potential influence of seed coat Pol IV function on endosperm expression would likely be  
19 independent of sRNA transfer. This conclusion is consistent with previous observations that  
20 endosperm and seed coat have distinct sRNA profiles (Erdmann et al., 2017).

21         We have shown that parental Pol IV activity is dispensable for guiding endosperm sRNA  
22 production at most loci, with the exception of imprinted sRNA regions, but that parental Pol IV  
23 activity plays an important role in guiding endosperm gene expression. The molecular nature of  
24 this memory is unknown, and at present we can only speculate. Data from paternal excess  
25 interploidy crosses suggests that the molecular identity of Pol IV memory may differ between  
26 the maternal and paternal parents. In the father, the genes required for sRNA production  
27 (*NRPD1*, *RDR2* and *DCL3*) and the genes required for downstream DNA methylation  
28 (*NRPE1/Pol V* and *DRM2*) are both essential to promote paternal excess seed abortion (Satyaki  
29 & Gehring, 2019). In contrast, in the mother, genes required for sRNA production but not for  
30 DNA methylation promote paternal excess seed viability (Satyaki & Gehring, 2019). This  
31 suggests that DNA methylation or another downstream chromatin mark directed by Pol IV-  
32 dependent sRNAs could be the identity of paternally-inherited memory, but is unlikely to be the  
33 molecular identity of maternally-inherited memory. What would be the nature of maternal DNA



1 methylation-independent memory? Pol IV, like other RNA polymerases (Studitsky et al., 2004),  
2 could act as a chromatin remodeler. Or, Pol IV could direct a chromatin modification, produce  
3 sRNAs that post-transcriptionally control genes, or control the expression of genes whose  
4 products are deposited in the gametes, which in turn sets up a memory to direct gene  
5 expression programs in the endosperm after fertilization.

6           How might we interpret Pol IV's parent-of-origin effects in terms of conflicts between  
7 parents? Studies on how resource allocation conflicts between parents impact gene expression  
8 have thus far been focused on imprinted genes. However, a handful of studies show the  
9 importance of non-imprinted genes in parent-of-origin effects (Al Adhami et al., 2015; Mott et al.,  
10 2014). For example, QTL analyses of a heterogeneous mouse stock showed that non-imprinted  
11 genes mediate parent-of-origin effects on the offspring's immune system (Mott et al., 2014). Our  
12 study describes for the first time a system in which an epigenetic regulator acts in the mother  
13 and the father to antagonistically regulate the same non-imprinted genes in the zygote. While  
14 the magnitude of effects at many genes may be small, it should be noted that small changes in  
15 gene expression can be associated with very different phenotypes (Ruzycki et al., 2015). Our  
16 allele-specific mRNA-seq data shows that loss of Pol IV from one parent can impact alleles  
17 inherited from both parents in the endosperm. This suggests that Pol IV does not act directly at  
18 antagonistic loci but acts instead by regulating other modifiers of gene expression. Yet, this  
19 antagonistic regulation can also be viewed through another perspective. Parental conflict can be  
20 resolved or paused if both parents can modulate the expression level of a gene or the activity of  
21 a pathway to an optimum that is tolerable to each. Pol IV's role in mediating the antagonistic  
22 effects of both parents makes it an ideal system to negotiate optimal gene expression levels.  
23 Thus, Pol IV may not be solely an agent of conflict, but also a means to resolving it. Overall,  
24 these data suggest that Pol IV is part of a gene regulatory network that is evolving under  
25 parental conflict.

26

## 27 **Materials and Methods**

### 28 **Arabidopsis growth conditions, strains and tissue collection**

29 Plants used in this experiment were grown at 22° C in a Conviron chamber on a 16hr light/8hr  
30 dark cycle (120 µM light). The *A. thaliana* mutant used in this study was *nprpd1a-4*  
31 (SALK\_083051 obtained from ABRC) (Herr et al., 2005) in the Col-0 background. We also  
32 utilized *nprpd1a-4* introgressed 4 times into Ler (Erdmann *et al*, 2017). Endosperm from

1 approximately 100 seeds (7 days after pollination) from at least three siliques was dissected  
2 free of embryos and seed coats and pooled for each biological replicate as previously described  
3 (Gehring *et al.*, 2011). Each biological replicate was collected from crosses that used different  
4 individuals as parents. The number of replicates for each experiment was decided based on  
5 currently accepted practices in genomic studies. For small RNA experiments, we planned to  
6 sample three biological replicates for each genotype. However, we had to discard one of the  
7 three *nprpd1*<sup>+/-</sup> sRNA libraries because that library had too few reads.

8

### 9 **mRNA, small RNA and DNA isolation and library construction**

10 Large and small sized RNAs were isolated using the RNAqueous micro RNA  
11 isolation kit (Thermo Scientific Fisher). Briefly, endosperm dissected from seeds was collected  
12 in lysis buffer and then homogenized with an RNase-free pellet pestle driven by a Kimble motor.  
13 Large and small RNA species were isolated and separated using the manufacturer's protocol.  
14 The RNA concentration of the larger fraction was measured by Qubit. Small RNA libraries were  
15 constructed using the NEXTflex sRNA-seq kit V3 (Biooscientific). Final library amplification was  
16 carried out for 25 cycles and the libraries were size selected (135-160bp) using a Pippin Prep  
17 (Sage Science). mRNA-seq libraries were constructed using a Smart-Seq2 protocol (Picelli *et al.*,  
18 2014). NanoPARE libraries were built as described in Schon *et al* (2018) All libraries were  
19 sequenced on the Illumina Hi-Seq 2500.

20

21 DNA for bisulfite sequencing was isolated from dissected endosperm at 7 days after  
22 pollination using QiaAMP DNA microkit (QIAGEN 56304). Dissected tissue was obtained for  
23 two biological replicates for each genotype and incubated overnight in a shaker at 56°C in ATL  
24 buffer with Proteinase K. Between 70 and 100ng of endosperm DNA obtained from crosses was  
25 subjected to bisulfite treatment using the Methylcode Bisulfite conversion kit (Invitrogen).  
26 Analysis of cytosines from chloroplasts with at least ten sequenced reads showed a conversion  
27 rate of greater than 98% for all libraries. Bisulfite converted DNA was used to build libraries with  
28 the Pico Methyl-Seq library kit (Zymo Research, D5455). 7 cycles of amplification was used for  
29 library construction. All libraries were sequenced on the Illumina Hi-Seq 2500 (60bp paired-  
30 end).

### 31 **Small RNA analysis**

1 Small RNA reads were trimmed with fastq\_quality\_trimmer (*fastq\_quality\_trimmer -v -t 20 -l 25*).  
2 Cutadapt (Martin, 2011) was used to identify adapter bearing reads of suitable length (*cutadapt*  
3 *-a TGGAATTCTCGGGTGCCAAGG --trimmed-only --quality-base 64 -m 24 -M 40 --max-n 0.5*  
4 *--too-long-output*). Taking advantage of the random nucleotides on the adapters in NEXTflex  
5 kits, we used Prinseq (prinseq-lite-0.20.4) (*prinseq-lite.pl -fastq <infile> -out\_format 3 -out\_good*  
6 *<filename> -derep 1 -log*) to remove PCR duplicates (Schmieder & Edwards, 2011). Filtered  
7 reads were aligned to a genome consisting of concatenated Col-0 TAIR10 and Ler pseudo-  
8 genome (Col-0 genome substituted with Ler SNPs) using Bowtie (v 1.2.2) *bowtie -v 2 --best -p*  
9 *8 -5 4 -3 4 --sam <index file> <infile.fq>* (Langmead et al., 2009). Reads mapping to Ler were  
10 lifted over to Col-0 using custom scripts (Erdmann et al., 2017). A custom script assign-to-allele  
11 was used to identify reads arising from Col-0 or Ler alleles  
12 ([https://github.com/clp90/imprinting\\_analysis/tree/master/helper\\_scripts](https://github.com/clp90/imprinting_analysis/tree/master/helper_scripts)). Aligned reads  
13 between 21 and 24nt in length were binned based on size. Bedtools was used to count reads in  
14 300-bp windows with 200-bp overlaps and over annotated genes and TEs from Araport 11.  
15 DESeq2 (Love et al., 2014) was used to identify features showing differences in small RNA  
16 abundance with an adjusted *p-value* of 0.05 or less. One complication with using DESeq2 is that  
17 the loss of Pol IV-dependent sRNAs at most loci in *nprp1*<sup>-/-</sup> leads to an underestimation of wild-  
18 type library size by DESeq2, which increases the proportion of false negatives and undercounts  
19 the number of Pol IV-dependent sRNA loci. To allay this effect while analyzing genes, we  
20 excluded TEs and applied differential expression analysis to just genic and miRNA loci. These  
21 non-TE loci also included Pol IV-independent sRNA loci, which provide an estimate of library  
22 size. We separately examined TEs using genic sRNA counts to provide an estimate of library  
23 size. ShortStack version 3.8.5 (Axtell, 2013) was also used as an orthogonal approach to  
24 identify small RNA peaks from bam alignment file output from Bowtie. Parameters chosen for  
25 ShortStack included *dicerm*=20, *dicerm*<sub>max</sub>=25 and a *mincov* of 0.5 rpm.

26

## 27 mRNA-seq and NanoPARE analysis

28 The reads from mRNA-Seq and NanoPARE were trimmed for quality with “*trim\_galore -q 25 --*  
29 *phred64 --fastqc --length 20 --stringency 5*” and aligned to the TAIR10 genome using Tophat  
30 (v2.1.1) (Kim et al., 2013) using the command *tophat -i 30 -l 3000 --segment-mismatches 1 --*  
31 *segment-length 18 --b2-very-sensitive*. Cuffdiff (v2.1.1) (Trapnell et al., 2013) was used to  
32 identify differentially expressed genes for mRNA-Seq data. Aligned NanoPARE read counts at

1 each nucleotide in the genome were counted using Bedtools. Sites with statistical differences in  
2 NanoPARE read counts were identified by DESeq2.

### 3 **DNA methylation analysis**

4 Reads from Bisulfite sequencing were trimmed for quality using Trim Galore.  
5 (<https://github.com/FelixKrueger/TrimGalore>). Trimmed reads were aligned to the TAIR10  
6 genome using Bismark (Krueger & Andrews, 2011) with parameters set to `-N 1 -L 20 --`  
7 `non_directional`. For this alignment, paired-end reads were treated as single reads. Previously  
8 described Bismark methylation extractor and custom scripts (Pignatta et al., 2014, 2015) were  
9 used to determine DNA methylation/base and then methylation was calculated for 300 bp  
10 windows that overlapped by 200bp. Data from the two biological replicates for each genotype  
11 were pooled together for comparison between genotypes. To be included in analysis, windows  
12 needed to have at least three overlapping cytosines and a depth of 6 reads/cytosine. Windows  
13 that differed between genotypes by 10% CHH, 20% CHG or 30% CG DNA methylation were  
14 identified as differentially methylated. Overlapping windows with differential methylation  
15 between genotypes were merged into differentially methylated regions. To increase the  
16 robustness of our conclusions, we added two data filtering steps. DNA methylation in the  
17 endosperm varies between maternal and paternal alleles and bisulfite sequencing is known to  
18 potentially enrich for methylated DNA (Ji et al., 2014). Since we were examining the  
19 consequences of loss of *NRPD1* in either parent, we could preferentially lose DNA methylation  
20 from one set of alleles. This could lead to lower coverage of one set of parental alleles and lead  
21 to faulty measurements of DNA methylation. We therefore limited our analyses to genomic  
22 regions in which reads arising from the maternally inherited genome accounted for 67%+/- 15%  
23 of total DNA reads (based on the fact that that 2/3 of the DNA in endosperm is maternally-  
24 inherited). Next, we identified DMRs between the two replicates for each genotype to mark  
25 regions where DNA methylation was variable within the same genotype. These regions were  
26 excluded from further analysis.

### 27 **Data Availability**

28 All high-throughput sequencing data will be available in GEO at GSEXXXX.

29

### 30 **Acknowledgements**

1 We thank the Whitehead Institute Genome Technology Core for high-throughput sequencing  
2 services and Dr. Mike Nodine for advice on NanoPARE. This research was supported by  
3 National Science Foundation Awards 1453459 and 2101337 to M.G.

#### 4 **Competing Interests**

5 The authors have no competing interests.

6

#### 7 **Supplemental Files**

8 **Figure S1:** Maternal and paternal Pol IV activity have opposing effects on paternal excess seed  
9 abortion.

10 **Figure S2:** RNA Pol IV is necessary for the production of 21-24nt sRNAs in the endosperm.

11 **Figure S3:** Impact of the loss of maternal and paternal *NRPD1* on the endosperm small RNA  
12 population.

13 **Figure S4:** RNA Pol IV-dependent small RNAs arise from both maternal and paternal alleles.

14 **Figure S5:** Tissue enrichment in dissected endosperm shows little seed coat contamination.

15 **Figure S6:** Impact of parental *NRPD1* on maternal and paternal allele contributions to total  
16 gene expression.

17 **Figure S7:** No relationship between Pol IV sRNAs and gene regulation.

18 **Figure S8:** No relationship between DNA methylation changes and genic mis-regulation in  
19 *nrpd1+/-*

20 **Table S1:** List of sequenced libraries.

21 **Table S2:** DESeq2 output for comparison of 21-24nt sRNA over genes between Wild-type and  
22 *nrpd1-/-*, maternal *nrpd1+/-*, paternal *nrpd1+/-*.

23 **Table S3:** DESeq2 output for comparison of 21-24nt sRNA over transposons between Wild-type  
24 and *nrpd1-/-*, maternal *nrpd1+/-*, paternal *nrpd1+/-*.

25 **Table S4:** Bedgraph for windows with differences in 21-24nt sRNA between Wild-type and  
26 *nrpd1-/-*, maternal *nrpd1+/-*, paternal *nrpd1+/-*.

1 **Table S5:** Bed files showing regions differentially methylated between wild-type, mat *nrpd1*<sup>+/-</sup>  
2 and pat *nrpd1*<sup>+/-</sup> endosperm.

3 **Table S6:** Cuffdiff output showing genes that are differentially expressed between wild-type,  
4 *nrpd1*<sup>-/-</sup>, mat *nrpd1*<sup>+/-</sup> and pat *nrpd1*<sup>+/-</sup>.

5 **Table S7:** Distance between mis-regulated genes and regions with differences in sRNAs and  
6 DNA methylation

7

## 8 **References**

- 9 Al Adhami, H., Evano, B., Le Digarcher, A., Gueydan, C., Dubois, E., Parrinello, H., Dantec, C.,  
10 Bouschet, T., Varrault, A., & Journot, L. (2015). A systems-level approach to parental  
11 genomic imprinting: The imprinted gene network includes extracellular matrix genes and  
12 regulates cell cycle exit and differentiation. *Genome Research*, *25*(3), 353–367.  
13 <https://doi.org/10.1101/gr.175919.114>
- 14 Axtell, M. J. (2013). ShortStack: Comprehensive annotation and quantification of small RNA  
15 genes. *RNA*. <https://doi.org/10.1261/rna.035279.112>
- 16 Blevins, T., Podicheti, R., Mishra, V., Marasco, M., Wang, J., Rusch, D., Tang, H., & Pikaard, C.  
17 S. (2015). Identification of Pol IV and RDR2-dependent precursors of 24 nt siRNAs guiding  
18 de novo DNA methylation in Arabidopsis. *ELife*, *4*. <https://doi.org/10.7554/eLife.09591>
- 19 Borg, M., Jacob, Y., Susaki, D., LeBlanc, C., Buendía, D., Axelsson, E., Kawashima, T., Voigt,  
20 P., Boavida, L., Becker, J., Higashiyama, T., Martienssen, R., & Berger, F. (2020).  
21 Targeted reprogramming of H3K27me3 resets epigenetic memory in plant paternal  
22 chromatin. *Nature Cell Biology*, *22*(6), 621–629. <https://doi.org/10.1038/s41556-020-0515-y>
- 23 Chaudhury, A. M., Ming, L., Miller, C., Craig, S., Dennis, E. S., & Peacock, W. J. (1997).  
24 Fertilization-independent seed development in Arabidopsis thaliana. *Proceedings of the*  
25 *National Academy of Sciences of the United States of America*, *94*(8), 4223–4228.  
26 <http://www.ncbi.nlm.nih.gov/pubmed/9108133>
- 27 Choi, Y., Gehring, M., Johnson, L., Hannon, M., Harada, J. J., Goldberg, R. B., Jacobsen, S. E.,  
28 & Fischer, R. L. (2002). DEMETER, a DNA Glycosylase Domain Protein, Is Required for  
29 Endosperm Gene Imprinting and Seed Viability in Arabidopsis. *Cell*, *110*(1), 33–42.  
30 [https://doi.org/10.1016/S0092-8674\(02\)00807-3](https://doi.org/10.1016/S0092-8674(02)00807-3)

- 1 Daxinger, L., Kanno, T., Bucher, E., Van Der Winden, J., Naumann, U., Matzke, A. J. M., &  
2 Matzke, M. (2009). A stepwise pathway for biogenesis of 24-nt secondary siRNAs and  
3 spreading of DNA methylation. *EMBO Journal*. <https://doi.org/10.1038/emboj.2008.260>
- 4 El-Brolosy, M. A., Kontarakis, Z., Rossi, A., Kuenne, C., Günther, S., Fukuda, N., Kikhi, K.,  
5 Boezio, G. L. M., Takacs, C. M., Lai, S.-L., Fukuda, R., Gerri, C., Giraldez, A. J., & Stainier,  
6 D. Y. R. (2019). Genetic compensation triggered by mutant mRNA degradation. *Nature*,  
7 *568*(7751), 193–197. <https://doi.org/10.1038/s41586-019-1064-z>
- 8 Erdmann, R. M., Satyaki, P. R. V., Klosinska, M., & Gehring, M. (2017). A Small RNA Pathway  
9 Mediates Allelic Dosage in Endosperm. *Cell Reports*.  
10 <https://doi.org/10.1016/j.celrep.2017.11.078>
- 11 Favorov, A., Mularoni, L., Cope, L. M., Medvedeva, Y., Mironov, A. A., Makeev, V. J., &  
12 Wheelan, S. J. (2012). Exploring Massive, Genome Scale Datasets with the GenometriCorr  
13 Package. *PLoS Computational Biology*, *8*(5), e1002529.  
14 <https://doi.org/10.1371/journal.pcbi.1002529>
- 15 Gehring, M., Missirian, V., & Henikoff, S. (2011). Genomic analysis of parent-of-origin allelic  
16 expression in arabidopsis thaliana seeds. *PLoS ONE*, *6*(8).  
17 <https://doi.org/10.1371/journal.pone.0023687>
- 18 Gehring, M., & Satyaki, P. R. (2017). Endosperm and imprinting, inextricably linked. *Plant*  
19 *Physiology*. <https://doi.org/10.1104/pp.16.01353>
- 20 Grossniklaus, U. (1998). Maternal Control of Embryogenesis by MEDEA, a Polycomb Group  
21 Gene in Arabidopsis. *Science*, *280*(5362), 446–450.  
22 <https://doi.org/10.1126/science.280.5362.446>
- 23 Grover, J. W., Burgess, D., Kendall, T., Baten, A., Pokhrel, S., King, G. J., Meyers, B. C.,  
24 Freeling, M., & Mosher, R. A. (2020). Abundant expression of maternal siRNAs is a  
25 conserved feature of seed development. *Proceedings of the National Academy of Sciences*  
26 *of the United States of America*. <https://doi.org/10.1073/pnas.2001332117>
- 27 Grover, J. W., Kendall, T., Baten, A., Burgess, D., Freeling, M., King, G. J., & Mosher, R. A.  
28 (2018). Maternal components of <sc>RNA</sc> -directed <sc>DNA</sc> methylation  
29 are required for seed development in *Brassica rapa*. *The Plant Journal*, *94*(4), 575–582.  
30 <https://doi.org/10.1111/tpj.13910>



- 1 Haig, D. (2013). Kin conflict in seed development: an interdependent but fractious collective.  
2 *Annual Review of Cell and Developmental Biology*, 29, 189–211.  
3 <https://doi.org/10.1146/annurev-cellbio-101512-122324>
- 4 Herr, A. J., Jensen, M. B., Dalmay, T., & Baulcombe, D. C. (2005). RNA polymerase IV directs  
5 silencing of endogenous DNA. *Science*. <https://doi.org/10.1126/science.1106910>
- 6 Ji, L., Sasaki, T., Sun, X., Ma, P., Lewis, Z. A., & Schmitz, R. J. (2014). Methylated DNA is over-  
7 represented in whole-genome bisulfite sequencing data. *Frontiers in Genetics*.  
8 <https://doi.org/10.3389/fgene.2014.00341>
- 9 Johansson, A.-M., Stenberg, P., Allgardsson, A., & Larsson, J. (2012). POF Regulates the  
10 Expression of Genes on the Fourth Chromosome in *Drosophila melanogaster* by Binding to  
11 Nascent RNA. *Molecular and Cellular Biology*, 32(11), 2121–2134.  
12 <https://doi.org/10.1128/MCB.06622-11>
- 13 Jullien, P. E., Grob, S., Marchais, A., Pumplin, N., Chevalier, C., Bonnet, D. M. V., Otto, C.,  
14 Schott, G., & Voinnet, O. (2020). Functional characterization of Arabidopsis ARGONAUTE  
15 3 in reproductive tissues. *The Plant Journal*, 103(5), 1796–1809.  
16 <https://doi.org/10.1111/tpj.14868>
- 17 Kim, D., Pertea, G., Trapnell, C., Pimentel, H., Kelley, R., & Salzberg, S. L. (2013). TopHat2:  
18 Accurate alignment of transcriptomes in the presence of insertions, deletions and gene  
19 fusions. *Genome Biology*. <https://doi.org/10.1186/gb-2013-14-4-r36>
- 20 Kirkbride, R. C., Lu, J., Zhang, C., Mosher, R. A., Baulcombe, D. C., & Chen, Z. J. (2019).  
21 Maternal small RNAs mediate spatial-temporal regulation of gene expression, imprinting,  
22 and seed development in Arabidopsis. *Proceedings of the National Academy of Sciences*,  
23 116(7), 2761–2766. <https://doi.org/10.1073/pnas.1807621116>
- 24 Kohler, C. (2003). Arabidopsis MSI1 is a component of the MEA/FIE Polycomb group complex  
25 and required for seed development. *The EMBO Journal*, 22(18), 4804–4814.  
26 <https://doi.org/10.1093/emboj/cdg444>
- 27 Krueger, F., & Andrews, S. R. (2011). Bismark: A flexible aligner and methylation caller for  
28 Bisulfite-Seq applications. *Bioinformatics*. <https://doi.org/10.1093/bioinformatics/btr167>
- 29 Langmead, B., Trapnell, C., Pop, M., & Salzberg, S. L. (2009). Bowtie: An ultrafast memory-  
30 efficient short read aligner. [<http://bowtie.cbcb.umd.edu/>]. *Genome Biology*.



- 1 Li, Jing, & Berger, F. (2012). Endosperm: Food for humankind and fodder for scientific  
2 discoveries. *New Phytologist*, 195(2), 290–305. [https://doi.org/10.1111/j.1469-](https://doi.org/10.1111/j.1469-8137.2012.04182.x)  
3 [8137.2012.04182.x](https://doi.org/10.1111/j.1469-8137.2012.04182.x)
- 4 Li, Jingwen, Yang, D. L., Huang, H., Zhang, G., He, L., Pang, J., Lozano-Durán, R., Lang, Z., &  
5 Zhu, J. K. (2020). Epigenetic memory marks determine epiallele stability at loci targeted by  
6 de novo DNA methylation. *Nature Plants*. <https://doi.org/10.1038/s41477-020-0671-x>
- 7 Li, S., Vandivier, L. E., Tu, B., Gao, L., Won, S. Y., Li, S., Zheng, B., Gregory, B. D., & Chen, X.  
8 (2015). Detection of Pol IV/RDR2-dependent transcripts at the genomic scale in  
9 Arabidopsis reveals features and regulation of siRNA biogenesis. *Genome Research*,  
10 25(2), 235–245. <https://doi.org/10.1101/gr.182238.114>
- 11 Love, M. I., Huber, W., & Anders, S. (2014). Moderated estimation of fold change and  
12 dispersion for RNA-seq data with DESeq2. *Genome Biology*.  
13 <https://doi.org/10.1186/s13059-014-0550-8>
- 14 Martin, M. (2011). Cutadapt removes adapter sequences from high-throughput sequencing  
15 reads. *EMBnet.Journal*. <https://doi.org/10.14806/ej.17.1.200>
- 16 Martinez, G., Wolff, P., Wang, Z., Moreno-Romero, J., Santos-González, J., Conze, L. L.,  
17 Defraia, C., Slotkin, R. K., & Köhler, C. (2018). Paternal easiRNAs regulate parental  
18 genome dosage in Arabidopsis. *Nature Genetics*. [https://doi.org/10.1038/s41588-017-](https://doi.org/10.1038/s41588-017-0033-4)  
19 [0033-4](https://doi.org/10.1038/s41588-017-0033-4)
- 20 Matzke, M. A., & Mosher, R. A. (2014). RNA-directed DNA methylation: an epigenetic pathway  
21 of increasing complexity. *Nature Reviews Genetics*, 15(6), 394–408.  
22 <https://doi.org/10.1038/nrg3683>
- 23 Mi, H., & Thomas, P. (2009). *PANTHER Pathway: An Ontology-Based Pathway Database*  
24 *Coupled with Data Analysis Tools* (pp. 123–140). [https://doi.org/10.1007/978-1-60761-175-](https://doi.org/10.1007/978-1-60761-175-2_7)  
25 [2\\_7](https://doi.org/10.1007/978-1-60761-175-2_7)
- 26 Milbocker, D., & Sink, K. (1969). EMBRYOLOGY OF DIPLOID × DIPLOID AND DIPLOID ×  
27 TETRAPLOID CROSSES IN POINSETTIA. *Canadian Journal of Genetics and Cytology*.  
28 <https://doi.org/10.1139/g69-070>
- 29 Moreno-Romero, J., Jiang, H., Santos-González, J., & Köhler, C. (2016). Parental epigenetic  
30 asymmetry of PRC2-mediated histone modifications in the Arabidopsis endosperm. *The*

- 1 *EMBO Journal*, 35(12), 1298–1311. <https://doi.org/10.15252/emj.201593534>
- 2 Mott, R., Yuan, W., Kaisaki, P., Gan, X., Cleak, J., Edwards, A., Baud, A., & Flint, J. (2014). The  
3 Architecture of Parent-of-Origin Effects in Mice. *Cell*, 156(1–2), 332–342.  
4 <https://doi.org/10.1016/j.cell.2013.11.043>
- 5 Müntzing, A. (1936). The Evolutionary Significance of Autopolyploidy. *Hereditas*.  
6 <https://doi.org/10.1111/j.1601-5223.1936.tb03204.x>
- 7 Ohad, N., Margossian, L., Hsu, Y. C., Williams, C., Repetti, P., & Fischer, R. L. (1996). A  
8 mutation that allows endosperm development without fertilization. *Proceedings of the*  
9 *National Academy of Sciences*, 93(11), 5319–5324.  
10 <https://doi.org/10.1073/pnas.93.11.5319>
- 11 Oshlack, A., & Wakefield, M. J. (2009). Transcript length bias in RNA-seq data confounds  
12 systems biology. *Biology Direct*, 4(1), 14. <https://doi.org/10.1186/1745-6150-4-14>
- 13 Panda, K., McCue, A. D., & Slotkin, R. K. (2020). Arabidopsis RNA Polymerase IV generates  
14 21–22 nucleotide small RNAs that can participate in RNA-directed DNA methylation and  
15 may regulate genes. *Philosophical Transactions of the Royal Society B: Biological*  
16 *Sciences*. <https://doi.org/10.1098/rstb.2019.0417>
- 17 Picelli, S., Faridani, O. R., Björklund, Å. K., Winberg, G., Sagasser, S., & Sandberg, R. (2014).  
18 Full-length RNA-seq from single cells using Smart-seq2. *Nature Protocols*, 9(1), 171–181.  
19 <https://doi.org/10.1038/nprot.2014.006>
- 20 Pignatta, D., Bell, G., & Gehring, M. (2015). Whole Genome Bisulfite Sequencing and DNA  
21 Methylation Analysis from Plant Tissue. *BIO-PROTOCOL*, 5(4).  
22 <https://doi.org/10.21769/BioProtoc.1407>
- 23 Pignatta, D., Erdmann, R. M., Scheer, E., Picard, C. L., Bell, G. W., & Gehring, M. (2014).  
24 Natural epigenetic polymorphisms lead to intraspecific variation in Arabidopsis gene  
25 imprinting. *ELife*, 3. <https://doi.org/10.7554/eLife.03198>
- 26 Povilus, R. A., Diggie, P. K., & Friedman, W. E. (2018). Evidence for parent-of-origin effects and  
27 interparental conflict in seeds of an ancient flowering plant lineage. *Proceedings of the*  
28 *Royal Society B: Biological Sciences*, 285(1872), 20172491.  
29 <https://doi.org/10.1098/rspb.2017.2491>
- 30 Rowley, M. J., Rothi, M. H., Böhmendorfer, G., Kuciński, J., & Wierzbicki, A. T. (2017). Long-range

- 1 control of gene expression via RNA-directed DNA methylation. *PLOS Genetics*, 13(5),  
2 e1006749. <https://doi.org/10.1371/journal.pgen.1006749>
- 3 Ruzycski, P. A., Tran, N. M., Kolesnikov, A. V., Kefalov, V. J., & Chen, S. (2015). Graded gene  
4 expression changes determine phenotype severity in mouse models of CRX-associated  
5 retinopathies. *Genome Biology*, 16(1), 171. <https://doi.org/10.1186/s13059-015-0732-z>
- 6 Satyaki, P. R. V., & Gehring, M. (2019). Paternally acting canonical RNA-directed DNA  
7 methylation pathway genes sensitize arabidopsis endosperm to paternal genome dosage.  
8 *Plant Cell*, 31(7), 1563–1578. <https://doi.org/10.1105/tpc.19.00047>
- 9 Schmieder, R., & Edwards, R. (2011). Quality control and preprocessing of metagenomic  
10 datasets. *Bioinformatics*. <https://doi.org/10.1093/bioinformatics/btr026>
- 11 Schon, M. A., Kellner, M. J., Plotnikova, A., Hofmann, F., & Nodine, M. D. (2018). NanoPARE:  
12 parallel analysis of RNA 5' ends from low-input RNA. *Genome Research*, 28(12), 1931–  
13 1942. <https://doi.org/10.1101/gr.239202.118>
- 14 Scott, R. J., Spielman, M., Bailey, J., & Dickinson, H. G. (1998). Parent-of-origin effects on seed  
15 development in *Arabidopsis thaliana*. *Development*, 125(17), 3329–3341.  
16 [http://www.ncbi.nlm.nih.gov/entrez/query.fcgi?cmd=Retrieve&db=PubMed&dopt=Citation&](http://www.ncbi.nlm.nih.gov/entrez/query.fcgi?cmd=Retrieve&db=PubMed&dopt=Citation&list_uids=9693137)  
17 [list\\_uids=9693137](http://www.ncbi.nlm.nih.gov/entrez/query.fcgi?cmd=Retrieve&db=PubMed&dopt=Citation&list_uids=9693137)
- 18 Stoute, A. I., Varenko, V., King, G. J., Scott, R. J., & Kurup, S. (2012). Parental genome  
19 imbalance in *Brassica oleracea* causes asymmetric triploid block. *Plant Journal*.  
20 <https://doi.org/10.1111/j.1365-313X.2012.05015.x>
- 21 Stroud, H., Greenberg, M. V. C., Feng, S., Bernatavichute, Y. V., & Jacobsen, S. E. (2013).  
22 Comprehensive analysis of silencing mutants reveals complex regulation of the  
23 *Arabidopsis* methylome. *Cell*, 152(1–2), 352–364. <https://doi.org/10.1016/j.cell.2012.10.054>
- 24 Studitsky, V. M., Walter, W., Kireeva, M., Kashlev, M., & Felsenfeld, G. (2004). Chromatin  
25 remodeling by RNA polymerases. In *Trends in Biochemical Sciences*.  
26 <https://doi.org/10.1016/j.tibs.2004.01.003>
- 27 Takuno, S., & Gaut, B. S. (2012). Body-methylated genes in *Arabidopsis thaliana* are  
28 functionally important and evolve slowly. *Molecular Biology and Evolution*, 29(1), 219–227.  
29 <https://doi.org/10.1093/molbev/msr188>
- 30 Trapnell, C., Hendrickson, D. G., Sauvageau, M., Goff, L., Rinn, J. L., & Pachter, L. (2013).

- 1 Differential analysis of gene regulation at transcript resolution with RNA-seq. *Nature*  
2 *Biotechnology*. <https://doi.org/10.1038/nbt.2450>
- 3 Vu, T. M., Nakamura, M., Calarco, J. P., Susaki, D., Lim, P. Q., Kinoshita, T., Higashiyama, T.,  
4 Martienssen, R. A., & Berger, F. (2013). RNA-directed DNA methylation regulates parental  
5 genomic imprinting at several loci in Arabidopsis. *Development (Cambridge, England)*,  
6 *140*(14), 2953–2960. <https://doi.org/10.1242/dev.092981>
- 7 Wang, Z., Butel, N., Santos-González, J., Borges, F., Yi, J., Martienssen, R. A., Martinez, G., &  
8 Köhler, C. (2020). Polymerase IV Plays a Crucial Role in Pollen Development in *Capsella*.  
9 *The Plant Cell*, *32*(4), 950–966. <https://doi.org/10.1105/tpc.19.00938>
- 10 Williams, B. P., Pignatta, D., Henikoff, S., & Gehring, M. (2015). Methylation-Sensitive  
11 Expression of a DNA Demethylase Gene Serves As an Epigenetic Rheostat. *PLOS*  
12 *Genetics*, *11*(3), e1005142. <https://doi.org/10.1371/journal.pgen.1005142>
- 13 Wu, W., & Zheng, B. (2019). Intercellular delivery of small RNAs in plant gametes. In *New*  
14 *Phytologist*. <https://doi.org/10.1111/nph.15854>
- 15 Xiao, W., Brown, R. C., Lemmon, B. E., Harada, J. J., Goldberg, R. B., & Fischer, R. L. (2006).  
16 Regulation of seed size by hypomethylation of maternal and paternal genomes. *Plant*  
17 *Physiology*. <https://doi.org/10.1104/pp.106.088849>
- 18 Xu, R., Wang, Y., Zheng, H., Lu, W., Wu, C., Huang, J., Yan, K., Yang, G., & Zheng, C. (2015).  
19 Salt-induced transcription factor MYB74 is regulated by the RNA-directed DNA methylation  
20 pathway in Arabidopsis. *Journal of Experimental Botany*, *66*(19), 5997–6008.  
21 <https://doi.org/10.1093/jxb/erv312>
- 22 Ye, R., Chen, Z., Lian, B., Rowley, M. J., Xia, N., Chai, J., Li, Y., He, X. J., Wierzbicki, A. T., &  
23 Qi, Y. (2016). A Dicer-Independent Route for Biogenesis of siRNAs that Direct DNA  
24 Methylation in Arabidopsis. *Molecular Cell*. <https://doi.org/10.1016/j.molcel.2015.11.015>
- 25 Zhai, J., Bischof, S., Wang, H., Feng, S., Lee, T., Teng, C., Chen, X., Park, S. Y., Liu, L.,  
26 Gallego-Bartolome, J., Liu, W., Henderson, I. R., Meyers, B. C., Ausin, I., & Jacobsen, S.  
27 E. (2015). A One Precursor One siRNA Model for Pol IV-Dependent siRNA Biogenesis.  
28 *Cell*, *163*(2), 445–455. <https://doi.org/10.1016/j.cell.2015.09.032>
- 29 Zhong, Z., Feng, S., Duttke, S. H., Potok, M. E., Zhang, Y., Gallego-Bartolomé, J., Liu, W., &  
30 Jacobsen, S. E. (2021). DNA methylation-linked chromatin accessibility affects genomic

1 architecture in Arabidopsis. *Proceedings of the National Academy of Sciences*, 118(5),  
2 e2023347118. <https://doi.org/10.1073/pnas.2023347118>

3 Zilberman, D., Gehring, M., Tran, R. K., Ballinger, T., & Henikoff, S. (2007). Genome-wide  
4 analysis of Arabidopsis thaliana DNA methylation uncovers an interdependence between  
5 methylation and transcription. *Nature Genetics*, 39(1), 61–69.  
6 <https://doi.org/10.1038/ng1929>

7

8

9
